# Supplementary material for: Reconstructing past variations in environmental conditions and paleoproductivityover the last ~ 8000 years off Central Chile (30° S)
Source: Copernicus journal article supplement (doi:10.5194/bg-2018-396), 2018-09-11
Supplement: Supplementary file [file bg-2018-396-AC3-supplement.pdf]

1 **Reconstructing past variations in environmental conditions and paleoproductivity**  
2 **over the last ~8000 years off Central Chile (30° S)**

3

4 Práxedes Muñoz<sup>1,2</sup>, Lorena Rebolledo<sup>3,4</sup>, Laurent Dezileau<sup>5</sup>, Antonio Maldonado<sup>2</sup>,  
5 Christoph Mayr<sup>6,7</sup>, Paola Cárdenas<sup>4,8</sup>, Carina B. Lange<sup>4,9,10</sup>, Katherine Lalangui<sup>9</sup>, Gloria  
6 Sanchez<sup>11</sup>, Marco Salamanca<sup>9</sup>, Karen Araya<sup>1,5</sup>, Ignacio Jara<sup>2</sup>, Gabriel Vargas<sup>12</sup>, Marcel  
7 Ramos<sup>1,2</sup>.

8

9 <sup>1</sup>Departamento de Biología Marina, Universidad Católica del Norte, Larrondo 1281,  
10 Coquimbo, Chile.

11 <sup>2</sup>Centro de Estudios Avanzados en Zonas Áridas (CEAZA), Coquimbo-La Serena,  
12 Chile.

13 <sup>3</sup>Departamento Científico, Instituto Antártico Chileno, Punta Arenas, Chile.

14 <sup>4</sup>Centro FONDAP de Investigación Dinámica de Ecosistemas Marinos de Altas  
15 Latitudes (IDEAL), Universidad Austral de Chile, Campus Isla Teja, Valdivia, Chile.

16 <sup>5</sup>Laboratoire Géosciences Montpellier (GM), Université de Montpellier, 34095  
17 Montpellier Cedex 05, France.

18 <sup>6</sup>Institut für Geographie, FAU Erlangen-Nürnberg, 91058 Erlangen, Germany.

19 <sup>7</sup>Department of Earth and Environmental Sciences & GeoBio-Center, LMU Munich,  
20 80333 Munich.

21 <sup>8</sup>Programa Magister en Oceanografía, Universidad de Concepción, casilla 160C,  
22 Concepción, Chile.

23 <sup>9</sup>Departamento de Oceanografía, Facultad de Ciencias Naturales y Oceanográficas,  
24 Universidad de Concepción, Casilla 160C, Concepción, Chile.

25 <sup>10</sup>Centro de Investigación Oceanográfica COPAS Sur-Austral, Universidad de  
26 Concepción, Casilla 160C, Concepción, Chile.

27 <sup>11</sup>Universidad de Magallanes, Punta Arenas, Chile.

28 <sup>12</sup>Departamento de Geología, Universidad de Chile, Santiago, Chile.

29

30 *Correspondence:* Práxedes Muñoz (praxedes@ucn.cl)

31

32 **Abstract**

33

34 The Coquimbo (30°S) region, in the North-central Chilean Coast, is characterized by  
35 relative dry summers and a short rainfall period during winter months. The wet-winter  
36 climate results from the interactions between the Southern Westerly Winds and the  
37 South Pacific Anticyclone (SPA). Interdecadal climate trends are mostly associated with  
38 El Niño-Southern Oscillation (ENSO), which produces high variability in precipitation.  
39 With the aim of establishing past variations of the main oceanographic and climatic  
40 features in the Central Chilean coast, we analyze recent sedimentary records of a  
41 transitional semi-arid ecosystem susceptible to environmental forcing conditions.  
42 Sediment cores were retrieved in two bays, Guanaqueros and Tongoy (29–30°S), for  
43 geochemical analyses including: sensitive redox trace elements, biogenic opal, total  
44 organic carbon (TOC), diatoms, stable isotopes of organic carbon and nitrogen. Three  
45 main periods of increased productivity were established: (1) > cal BP 6500, (2) cal BP  
46 2000 – cal BP 4600 and (3) during recent time (CE 2015) – cal BP ~260. The first  
47 period was conspicuously high during the main dry phase concomitant with high fluxes  
48 of organic compounds to the bottom and suboxic-anoxic conditions in the sediments.  
49 This period reached a maximum at cal BP ~6700, followed by a continuous increase in  
50 moisture levels, low primary productivity and a more oxygenated environment towards  
51 the present, being remarkably stronger in the last 2000 years. We suggest that this might  
52 be associated with greater El Niño frequencies or similar conditions that increase  
53 precipitation, concomitantly with the introduction of oxygenated waters to coastal zones  
54 by the propagation of equatorial origin waves.

55

56 **Keywords:** paleoproductivity, paleoredox, trace metals, diatoms, opal, organic carbon,  
57 Coquimbo, SE-Pacific

58

## 59 **1. Introduction**

60

61 The northern-central Chilean continental margin (18–30°S) has distinct zones of intense  
62 upwelling highly influenced by topographic features (Figueroa and Moffat, 2000). As a  
63 result, high primary production ( $0.5\text{--}9.3\text{ g C m}^{-2}\text{ d}^{-1}$ ) are developed off Iquique (21°S),  
64 Antofagasta (23°S) and Coquimbo (30°S) (González et al., 1998; Daneri et al., 2000,  
65 Thomas et al., 2001). This productivity takes place close to the coast above the narrow  
66 continental shelf, allowing the development of important fisheries and accounting for up  
67 to 40% of total annual catches (Escribano et al., 2004 and references therein).

68 This high productivity maintains a zone of low dissolved oxygen content along the  
69 Chilean margin, reinforcing the oxygen minimum zone (OMZ) that develops along the  
70 North and South Pacific Ocean, where their intensity, thickness, and temporal stability  
71 vary as a function of latitude (Helly and Levin, 2004, Ulloa et al., 2012). To the north  
72 (e.g. 21°S) and off Peru, the OMZ occurs permanently, can extend into the euphotic  
73 zone and, in the case of northern Chile and southern Peru, shows no significant interface  
74 with the benthic environment due to the presence of a narrow continental shelf (Helly  
75 and Levin, 2004).

76 Past changes in the productivity and oxygenation of bottom waters at different  
77 timescales have been evidenced in the SE Pacific through sedimentary records that  
78 cover from the Last Glacial Maximum (cal BP 22,000 –18,000) to the present. Different  
79 climate-ocean drivers have been proposed to account for these changes. For instance,  
80 latitudinal movements of the Southern Westerlies Winds (SWW) and the Antarctic  
81 Circumpolar Current (ACC) have been suggested as potential mechanisms (Hebbeln et  
82 al., 2002; Lamy et al., 2001; 2002; 2010). In addition, changes in the intensity and  
83 position of the Southeast Pacific Subtropical Anticyclone (SPSA) from seasonal, to  
84 interdecadal timescale have effects on wind stress and water mass circulation  
85 (Ancapichún and Garcés-Vargas, 2015), and therefore past variability in the SPSA has  
86 been used to explain changes in paleoceanographic features of the SE Pacific such as  
87 the intensity of upwelling, and circulation patterns responsible for the nutrient supply  
88 (Marchant et al., 1999; Hebbeln et al., 2002; Dezileau et al., 2004; Romero et al., 2006;  
89 Mohtadi et al., 2008; Gutiérrez et al., 2009; Saavedra-Pellitero et al., 2011; Muñoz et  
90 al., 2012). Past climate-upwelling fluctuations at millennial timescales has also been  
91 linked to the austral insolation, which influence Antarctic sea ice extent and the Hadley  
92 cell, this latter an important forcing to the latitudinal cycle of the ITCZ (Intertropical

93 Convergence Zone; Kaiser et al., 2008 and reference there in). This variability produces  
94 humid and arid conditions along the SE Pacific where the intensity of wind has a key  
95 role for the upwelling and hence productivity. On top of all this, an important driver of  
96 modern ocean-atmosphere conditions in the South East Pacific is the El Niño/Southern  
97 Oscillation (ENSO), which has a major impact on modern marine productivity  
98 (Escribano et al., 2002). Paleo-ENSO reconstructions indicate attenuated ENSO events  
99 before the mid-Holocene (last 5000 years) and increasing from this period towards the  
100 present (Marchant et al., 1999;; Koutavas et al., 2006; Vargas et al., 2006), consistent  
101 with paleoceanographic and paleoclimate interpretations (Rodbell et al., 1999; Rein et  
102 al., 2005). Heavy rainfall episodes in the south East Pacific normally occur during  
103 strong El Niño conditions (Montecinos and Aceituno, 2003), increasing the river flux  
104 and producing flood debris (Garreaud and Rutllant, 1996). These episodes have been  
105 recorded in sedimentary records off northern Chile and southern Peru, establishing a  
106 teleconnection which has operated since the mid-Holocene, and identifying the modern  
107 manifestation of El Niño starting at ~5000 cal BP (Vargas et al., 2006).

108

109 The effect of climate variations on primary productivity and biogeochemical cycles  
110 could have different responses. For instance, the increase in land-sea thermal contrast in  
111 North-Central Chile enhances upwelling and with it, exported production (Vargas et al.,  
112 2007). Other evidence, however, suggest that the intrusion of warmer oligotrophic water  
113 reduce primary productivity, as observed during the 97-98 ENSO event (Iriarte and  
114 Gozález, 2004). Furthermore, in South central Chile (36°S) the oxygenation of bottoms  
115 was clearly detected during the 97-98 El Niño event, changing the geochemical  
116 conditions of surface sediments and macrofauna composition. These disturbances may  
117 extend considerably to the south, with implications persistent for many years and impact  
118 the sedimentary records of several proxies (Sellanes et al., 2007; Gutiérrez et al., 2006).  
119 Our work focuses on the past variations of the environmental conditions and marine  
120 productivity in sedimentary records from a transitional semi-arid ecosystem of Central  
121 Chilean coast (30°S), an area highly susceptible to oceanographic and climatic forcing.  
122 The study area (Fig. 1) provides an adequate platform to observe environmental  
123 variability at different time scales. We were able to identify wet/dry intervals, periods  
124 with high/low primary production, and changes in redox conditions at bottoms through  
125 inorganic (trace metals) and organic proxies.

126

## 127 **2. Study area**

128 The Coquimbo area (29-30°S), in the southern limit of the northern-central Chilean  
129 continental margin, constitutes a border area between the most arid zones of northern  
130 Chile (Atacama Desert) and the more mesic Mediterranean climate of central Chile  
131 (Montecinos et al., 2015). Here, the shelf is narrow and several small bays trace the  
132 coast line.

133 The Tongoy and Guanaqueros bays are located at the southern edge of a broad  
134 embayment between small islands in the north (29°S; Choros, Damas and Chañaral) and  
135 Lengua de Vaca Point in the south (30°S) (Fig. 1), protected from predominant  
136 southerly winds. Tongoy Bay is a narrow marine basin (10 km at its maximum width)  
137 with a maximum depth of ~100 m. To the northeast lies Guanaqueros Bay, a smaller  
138 and shallower basin. Favorable winds throughout the year promote an important  
139 upwelling center at Lengua de Vaca Point, developing high biomass along a narrow  
140 coastal area (Moraga-Opazo et al., 2011), and reaching maximum concentrations of ~20  
141 mg m<sup>-3</sup> (Torres et al., 2009). At the shallow waters of Tongoy Bay, the high primary  
142 productivity results in high TOC in the water column allowing the deposition of fine  
143 material on the bottom; TOC increases concurrently with the periods of low oxygen  
144 conditions (Fig. 3; Muñoz et al., unpublished data). Recent oceanographic studies  
145 indicate that the low dissolved oxygen water intrusions from the shelf (Fig. 2) seems to  
146 be related to sea level decreases resulting from local wind annual cycles at a regional  
147 meso-scale (Gallardo et al., 2017). The spatial and temporal variability of these  
148 processes are still under study.

149 Sedimentological studies are scarce in the northern-central Chilean shelf. A few  
150 technical reports indicate that sediments between 27°S and 30°S are composed of very  
151 fine sand and silt with relatively low organic carbon content (<3 and ~5%), except at  
152 very limited coastal areas where organic material accounts for around ~16% (Muñoz,  
153 unpublished data; FIP2005-61 Report, [www.fip.cl](http://www.fip.cl)). Coastal weathering is the main  
154 source of continental input due to scarce river flows and little rainfall in the zone (0.5 to  
155 ~20 mm yr<sup>-1</sup>; <https://es.climate-data.org/location/940/>, Fig.1). Freshwater discharges are  
156 represented by creeks, which receive the drainage of the coastal range forming wetland  
157 areas in the coast and even small estuaries, as Pachingo located south of Tongoy (Fig.  
158 1). These basins cover ~300 and 487 km<sup>2</sup>, respectively. The water volume in the  
159 estuaries is maintained by the influx of seawater mixed with groundwater supply. No  
160 surface flux to the sea is observed. Therefore, freshwater discharge occurs only during

161 high rainfall periods in the coastal zone (DGA, 2011), which normally takes place  
162 during El Niño years when higher runoff has been recorded in the area during austral  
163 winter time (Valle-Levinson et al., 2000; Garreaud et al., 2009). In this scenario marine  
164 sediments are often highly influenced by primary production in the water column, and  
165 therefore sedimentary records can reveal past variability in primary production and the  
166 oceanographic conditions over the shelf, which ultimately respond to major atmospheric  
167 patterns.

168

### 169 **3. Materials and methods**

#### 170 **3.1. Sampling**

171 Sediment cores were retrieved from two bays in the Coquimbo region: Bahía  
172 Guanaqueros (core BGGC5; 30°09' S, 71°26' W; 89 m water depth) and Bahía Tongoy  
173 (core BTGC8; 30°14' S, 71°36' W; 85 m water depth) (Fig. 1.), using a gravity corer  
174 (KC-Denmark) in May 2015, on board the L/C Stella Maris II owned by the  
175 Universidad Católica del Norte. The length of the cores was 126 cm for BGGC5 and 98  
176 cm for BTGC8. Both cores were cut along the main axis and a general visual  
177 characterization was done. Different textures and color layers were identified using the  
178 Munsell color chart.

179 Subsequently, the cores were sliced into 1-cm sections and subsamples were separated  
180 for grain size measurements, magnetic susceptibility, trace elements, biogenic opal, C  
181 and N stable isotope signatures ( $\delta^{13}\text{C}$ ,  $\delta^{15}\text{N}$ ), and TOC analyses. The samples were first  
182 kept frozen ( $-20^\circ\text{C}$ ) and then freeze-dried before laboratory analyses.

183 The magnetic signal indicates the concentrations and compositions of magnetic  
184 minerals and is usually used combined with others detrital proxies such as grain size to  
185 establish changes in sedimentary processes closely controlled by climatic conditions.

186 We considered redox trace elements measurements that respond to local hypoxia (U,  
187 Mo and Re) as well as nutrient-type elements, which follow the organic fluxes to the  
188 sediments (Ba, Ni Cu, P). Additionally, we measured Fe and Mn which play a key role  
189 in adsorption-desorption and scavenging processes of dissolved elements in the bottom  
190 water and sediments. We also measured Ca, K and Pb used to assess terrigenous inputs  
191 by coastal erosion, weathering and eolian transport, which is also true for Fe and Mn.  
192 Ca accumulation within the sediments depends, in turn, on the carbonate productivity  
193 and dissolution, which has been used as a paleoproductivity proxy (Paytan, 2008; Govin  
194 et al., 2012). We use Al as a normalizing parameter for enrichment/depletion of

195 elements due to its conservative behavior. The crustal contribution and the elements are  
196 presented as metal/Al ratios. The authigenic enrichment factor of elements was  
197 estimated according to:  $EF = (Me/Al)_{\text{sample}} / (Me/Al)_{\text{detrital}}$ ; where  $(Me/Al)_{\text{sample}}$  is the  
198 bulk sample metal (Me) concentration normalized to Al content and the denomination  
199 “detrital” indicates a lithogenic background (Böhning et al., 2009). Detrital  
200 concentrations ( $[Me]_{\text{detrital}}$  and  $[Al]_{\text{detrital}}$ ) were established considering the local TM  
201 abundance, which is more accurate than using mean Earth crust values (Van der  
202 Weijden, 2002). We used the average of element concentrations at the surface sediments  
203 (0–3 cm) of Pachingo wetland (Table 1).

204 Diatoms and siliceous microfossils were identified and counted. Diatoms assemblages  
205 along with biogenic opal content constitute our proxies of siliceous export production.  
206 Pollen grains were also identified and counted, and used to identify wet and dry  
207 environmental conditions based on the climate relationship of the main vegetation  
208 formation in north-central Chile. TOC and stable isotopes of organic matter were used  
209 to identify the variability of organic fluxes to the bottom and establish biogeochemical  
210 changes in the organic matter remineralization.

211

### 212 **3.2, Geochronology ( $^{210}\text{Pb}$ and $^{14}\text{C}$ )**

213  $^{210}\text{Pb}$  activities were quantified through alpha spectrometry of its daughter  $^{210}\text{Po}$  in  
214 secular equilibrium with  $^{210}\text{Pb}$ , using  $^{209}\text{Po}$  as a yield tracer (Flynn, 1968). The chemical  
215 procedure considered a total digestion of the sediment samples and then autoplated onto  
216 silver disks at  $\sim 75^\circ\text{C}$  for 3 three hours in the presence of ascorbic acid. The  $^{210}\text{Po}$   
217 activity was counted in a CANBERRA QUAD alpha spectrometer, model 7404, until  
218 the desired counting statistics was achieved (4–10%  $1\sigma$  errors) in the Chemical  
219 Oceanography Laboratory of Universidad de Concepción.  $^{210}\text{Po}$  activity –assumed to be  
220 in secular equilibrium with  $^{210}\text{Pb}$ – was calculated using the ratio between natural  
221 radionuclide and the tracer, which is multiplied by the activity of the tracer at the time  
222 of plating. The period elapsed between plating and counting produces  $^{210}\text{Po}$  decay (half-  
223 life: 138 days) and between sampling and plating  $^{210}\text{Pb}$  decay (half-life: 22.3 yr);  
224 counting was corrected to these elapsed times even when there was a short time period  
225 between the collection date and the time of sample analysis (less than one year). Ages  
226 were estimated using the inventories of the activities in excess ( $^{210}\text{Pb}_{\text{xs}}$ , unsupported),  
227 based on the Constant Rate of Supply Model (CRS, Appleby and Oldfield, 1978).  
228 Unsupported activities were determined as the difference between  $^{210}\text{Pb}$  and  $^{226}\text{Ra}$

229 activities measured in some sediment column intervals.  $^{226}\text{Ra}$  was measured with a  
230 gamma spectrometry at the Laboratoire Géosciences of the Université de Montpellier  
231 (France). Standard deviations (SD) of the  $^{210}\text{Pb}$  inventories were estimated propagating  
232 counting uncertainties (Bevington and Robinson, 1992) (Table S1, supplementary data).  
233 Radiocarbon measurements were performed on a mix of planktonic foraminifera species  
234 in core BGGC5 whereas the benthic foraminifera species *Bolivina plicata* was selected  
235 for core BTGC8 (Table 2). Freeze-dried sediment was washed over a 63  $\mu\text{m}$  mesh-size  
236 sieve and dried after washing at 50°C. At least 2 mg of mixed planktonic foraminifera  
237 were picked from the 125–250  $\mu\text{m}$  fraction. The samples were submitted to the National  
238 Ocean Sciences AMS Facility (NOSAMS) of the Woods Hole Oceanographic  
239 Institution (WHOI). The Fraction Modern (Fm) was corrected by the  $\delta^{13}\text{C}$  value, and  
240 ages were calculated using 5568 (yrs) as the half-life of radiocarbon. The time scale was  
241 obtained according to the best fit of  $^{210}\text{Pb}_{\text{xs}}$  curves and  $^{14}\text{C}$  points, using the CLAM 2.2  
242 software and Marine curve 13C (Reimer et al, 2013), and considering a reservoir of 146  
243  $\pm 25$  years, established for Coquimbo coastal margin (Carré et al., 2016) (Fig. 4).

244

### 245 **3.3. Geophysical characterization**

246 Magnetic susceptibility ( $\text{SI} \times 10^{-8}$ ) was measured with a Bartington Susceptibility Meter  
247 MS2E in the Sedimentology Laboratory at Centro Eula, Universidad de Concepción.

248 Mean values from three measurements were calculated for each sample.

249 Grain size was determined using a Mastersizer 2000 laser particle analyzer, coupled to a  
250 Hydro 2000–G Malvern in the Sedimentology Laboratory of Universidad de Chile.

251 Skewness, sorting and kurtosis were evaluated using the GRADISTAT statistical  
252 software (Blott and Pye, 2001), which includes all particle size spectra.

253

### 254 **3.4. Trace elements analysis**

255 Trace element analyses were performed by ICP-MS (Inductively Coupled Plasma-Mass  
256 Spectrometry) and carried out at Université de Montpellier 2, France (OSU  
257 OREME/AETE regional facilities), using an Agilent 7700x. About 50 mg of samples  
258 and geochemical reference materials (UBN, BEN and MAG1) were dissolved twice  
259 through the conventional digestion method using a concentrated HF-HNO<sub>3</sub>-HClO<sub>4</sub> mix  
260 (1:1:0.1) in Savillex screw-top Teflon beakers at 120°C, on a hot plate during 48h.  
261 Following digestion, the samples were subjected to three evaporation steps in order to  
262 remove fluorine. Shortly before analysis, samples were dissolved in 2 ml of



263 concentrated HNO<sub>3</sub> and transferred to 20 ml polypropylene bottles. Final sample  
264 preparation was undertaken by dilution with ultrapure water to a sample-solution weight  
265 ratio of 1: 4000-5000 and the addition of a known weight of internal standard solution  
266 consisting of 1 ppb of In and Bi. Internal standardization used ultra-pure solution  
267 enriched in In and Bi, both elements whose natural abundances in geological samples  
268 do not contribute significantly to the added internal standard. This is used to deconvolve  
269 mass-dependent sensitivity variations of both matrix and instrumental origin, occurring  
270 during the course of an analytical session.

271 Sample introduction uses a peristaltic pump, a micro-nebulizer and a cooled double-  
272 pass Scott type spray chamber. The uptake time (typically 45 s) is set to facilitate stable  
273 analyte signals prior to a 120 seconds analysis for each sample. Elements with an  
274 atomic mass lower than 80 were analyzed in collision mode using He; heavier elements  
275 were analyzed in no-gas mode. A wash out procedure consisting of 60 seconds with  
276 HNO<sub>3</sub> 10% and 120 seconds with 2% HNO<sub>3</sub> has been found appropriate to achieve  
277 instrument blank level. The total time for analysis of a single sample solution is *c.* 3  
278 minutes. Mean concentrations for the analyzed samples were determined by external  
279 calibrations prepared daily from multi- and mono-elemental solutions, with  
280 concentrations in the range of 0.05–10 ppb for trace elements and of 1–10 ppm for  
281 major elements (Ca, K). Polyatomic interferences were controlled by running the  
282 machine at an oxide production level <1%. Typical analytical precisions attained by this  
283 technique are generally between 1% and 3%, relative standard deviation. Accuracy has  
284 been assessed with an analysis of international reference materials and results show  
285 agreement generally better than ±5% with reference values.

286

### 287 **3.5. TOC and stable isotopes**

288 TOC and stable isotope ( $\delta^{15}\text{N}$  and  $\delta^{13}\text{C}$ ) analyses were performed at the Institut für  
289 Geographie, Friedrich Alexander Universität (FAU) Erlangen-Nürnberg, Germany. Dry  
290 material was placed into tin and silver capsules for N and C analyses respectively, and  
291 combusted at 1060° C in a continuous helium flow in an elemental analyzer (NC2500,  
292 Carlo Erba), in the presence of chromium oxide and silvered cobalt oxide. The resulting  
293 gases, were passed over copper wires at 650° C to reduce nitrogen and excess oxygen.  
294 Thereafter, water vapor was trapped with Mg(ClO<sub>4</sub>)<sub>2</sub> and the remaining gases (N<sub>2</sub> and  
295 CO<sub>2</sub>) were separated in a gas chromatography column at 45° C. N<sub>2</sub> and CO<sub>2</sub> were  
296 passed successively via a ConFloII interface into the isotope-ratio-mass spectrometer

297 (Delta Plus, Thermo-Finnigan) and isotopically analyzed. Carbon and nitrogen contents  
298 were determined from the peak-area-versus-sample-weight ratio of each individual  
299 sample and calibrated with the elemental standards cyclohexanone-2,4-  
300 dinitrophenylhydrazone (C<sub>12</sub>H<sub>14</sub>N<sub>4</sub>O<sub>4</sub>) and atropine (C<sub>17</sub>H<sub>23</sub>NO<sub>3</sub>) (Thermo Quest). A  
301 laboratory-internal organic standard (Peptone) with known isotopic composition was  
302 used for final isotopic calibrations. Stable isotope ratios are reported in the  $\delta$  notation as  
303 the deviation relative to international standards (Vienna Pee Dee Belemnite for  $\delta^{13}\text{C}$  and  
304 atmospheric N<sub>2</sub> for  $\delta^{15}\text{N}$ ), so  $\delta^{13}\text{C}$  or  $\delta^{15}\text{N} = [(R \text{ sample}/R \text{ standard}) - 1] \times 10^3$ , where R  
305 is  $^{13}\text{C}/^{12}\text{C}$  or  $^{15}\text{N}/^{14}\text{N}$ , respectively. Typical precision of the analyses was  $\pm 0.1\%$  for  
306  $\delta^{15}\text{N}$  and  $\delta^{13}\text{C}$ .

307

### 308 **3.6. Biogenic opal**

309 Biogenic opal was estimated following the procedure described by Mortlock and  
310 Froelich (1989) with a slight modification, which consists in extracting 50 mg of  
311 sediment with 1 M NaOH (instead of 2 M Na<sub>2</sub>CO<sub>3</sub>) at 85°C for 5 hours. Extraction and  
312 analysis by molybdate-blue spectrophotometry (Hansen and Koroleff, 1999) were  
313 conducted at the laboratories of Marine Organic Geochemistry and Paleoceanography,  
314 University of Concepción, Chile. Values are expressed as biogenic opal by multiplying  
315 the Si (%) by 2.4 (Mortlock and Froelich, 1989). Analytical precision was  $\pm 0.5\%$ .  
316 Accumulation rates were determined based on sediment mass accumulation rates and  
317 amount of opal at each core section in %.

318

### 319 **3.7. Diatoms and siliceous microfossils**

320 Smear slides for qualitative abundances of siliceous microfossils were carried out every  
321 centimeter following the Ocean Drilling Program (ODP) protocol described by  
322 Mazzullo et al. (1988.) To determine the quantitative abundance of siliceous  
323 microfossils (diatoms, silicoflagellates, sponge spicules, crysophyts and phytoliths), ~  
324 0.5 g of freeze-dried sediment was treated according to Schrader and Gersonde (1978).  
325 Samples were chosen every ~4, 8 and 12 cm for BGGC5 and at an average of 6 cm for  
326 BTGC8. Permanent slides were prepared by placing a defined sample volume (0.2 ml)  
327 onto microscope slides that were then air-dried and mounted with Naphrax mounting  
328 medium (refraction index =1.3). Siliceous microfossils were identified and counted  
329 under an Olympus CX31 microscope with phase contrast. 1/5 of the slides were counted

330 at 400X for siliceous microfossils and one transect at 1000x was counted for  
331 *Chaetoceros* resting spores. Two slides per sample were counted; the estimated  
332 counting error was 15%. Total diatom abundances are given in valves  $\text{g}^{-1}$  of dry  
333 sediments.

334

### 335 **3.8. Pollen**

336 Sample preparation for pollen analysis was conducted following the standard  
337 methodology for sediment samples (Faegri and Iversen, 1989), which includes  
338 deflocculating with 10% KOH, carbonate dissolution with a 5% HCl treatment, silica  
339 dissolution with 30% HF, and cellulose removal *via* acetolysis reactions. Samples were  
340 mounted with liquid glycerol and sealed permanently with paraffin wax. Pollen  
341 identification was conducted under a stereomicroscope at 400 fold magnification with  
342 the assistance of the Heusser (1971) pollen catalogue. A total of 100-250 terrestrial  
343 pollen grains were counted on each sample depending on their abundance. Pollen  
344 percentage for each taxon was calculated from the total sum of terrestrial pollen. The  
345 percentage of aquatic pollen and fern spores was calculated based on the total terrestrial  
346 sum plus their respective group. Pollen percentage diagrams were generated using the  
347 Tilia software (E. Grimm, Illinois State Museum, Springfield, IL. USA). The diagram  
348 was divided into “zones” based on the identification of the most important changes in  
349 pollen percentage and assisted by a cluster ordination (CONISS) performed by the same  
350 software.

351 We further summarize pollen-based precipitation trends by calculating a Pollen  
352 Moisture Index (PMI), which is defined as the normalized ratio between Euphorbiaceae  
353 (wet coastal scrubland) and Chenopodiaceae (arid scrubland). Thus, positive (negative)  
354 values of this index indicate the relative expansion (reduction) of coastal scrubland  
355 under relatively wetter (drier) conditions.

356

## 357 **4. Results**

### 358 **4.1. Geochronology**

359  $^{210}\text{Pb}_{\text{xs}}$  (unsupported activity) was obtained from the surface down to 8 cm depth in the  
360 two cores, with an age of  $\sim$  AD 1860 at 7 cm in both of them (Table S1). Greater  
361 surface activities were obtained for core BGGC5 ( $13.48 \pm 0.41$  dpm  $\text{g}^{-1}$ ) compared to  
362 core BTGC8 ( $5.80 \pm 0.19$  dpm  $\text{g}^{-1}$ ), showing an exponential decay with depth (Fig. 4).  
363 A recent sedimentation rate of  $0.11 \pm 0.01$  cm  $\text{yr}^{-1}$  was estimated.

364 The age model provided a maximum age of cal BP 8469 for core BGGC5, and cal BP  
365 8199 for core BTGC8 (Fig. 4). A mean sedimentation rate of  $0.02 \text{ cm yr}^{-1}$  was estimated  
366 for core BGGC5, with a period of relative low values ( $0.01 \text{ cm yr}^{-1}$ ) between cal BP  
367 4000 and 6000. For BTGC8, sedimentation rates were less variable and around  $0.013$   
368  $\text{cm yr}^{-1}$  in the entire core. An age reservoir estimation following the methodology of  
369 Sabatier et al. (2010) resulting in, 441 and 442 years for BGGC5 and BTGC8 cores,  
370 respectively (Table 3). These values were close to global marine reservoir and higher  
371 than other estimations along Chilean margin at shallower depths ( $146 \pm 25$  years at  $< 30$   
372 water depth; Carré et al., 2016; Merino-Campos et al., 2018). Our cores sites are deeper  
373 ( $\sim 90$  m water depth) receiving the influence of upwelled water from Lengua de Vaca  
374 Point, which could explain such differences. However, moderated differences were  
375 observed between models using these different reservoir values. Our estimations were  
376 based only on two pre-bomb values established with  $^{210}\text{Pb}$  measured in sediments and  
377  $^{14}\text{C}$  in foraminifers, therefore the value estimated by Carré et al. (2016) was used for  
378 the age modeling; but this situation deserve attention and tested with a larger set of data  
379

#### 380 **4.2. Geophysical characterization**

381 The sediments retrieved from the bays showed fine grains in the range of very fine sand  
382 and silt in the southern areas. There, the grain size distribution was mainly unimodal,  
383 very leptokurtic, better sorted and skewed to fine grain when compared to sediments  
384 from the northern areas. Sediment cores obtained from the northern areas were sandy  
385 (coarse sand and gravel), with abundant calcareous debris. Longer cores of soft  
386 sediment were retrieved at the southern areas (BGGC5 and BTGC8), where the silty  
387 component varied between 40 % and 60 % (Fig. 1 and 5a,b). The clay component was  
388 very low at both cores ( $< 2\%$ ). The sediment's color ranged from very dark grayish  
389 brown to dark olive brown (2.5Y 3/3–3/2) at Guanaqueros Bay (BGGC5) and from dark  
390 olive gray to olive gray (5Y 3/2–4/2) at Tongoy Bay (BTGC8). Visible macro-remains  
391 (snails and fish vertebrae) were found and weak laminations were identified at both  
392 cores. The magnetic susceptibility showed higher values close to the surface, up to  $127$   
393  $\text{SI} \times 10^{-8}$  at BGGC5 and relative lower values ( $85 \text{ SI} \times 10^{-8}$ ) at BTGC8. At greater depths,  
394 however, the values were very constant, around  $5\text{--}8 \times 10^{-8} \text{ SI}$  at BGGC5 core and  
395 around  $12\text{--}20 \times 10^{-8} \text{ SI}$  at BTGC8 core. In both cores, susceptibility increases  
396 substantially after cal BP 13 (Figs. 5a, 5b). Lower bulk densities were estimated at the  
397 core BGGC5 ( $0.7\text{--}0.9 \text{ g cm}^{-3}$ ) compared to the core BTGC8 ( $> 1 \text{ g cm}^{-3}$ ) (Fig. 5a, 5b). In

398 accordance with this, the mean grain size was 60–80  $\mu\text{m}$  at Guanaqueros Bay (BTGC8),  
399 compared to 50–60  $\mu\text{m}$  at Tongoy Bay (BGGC5). Both cores were negatively skewed,  
400 with values of -1 to -1.2 at BGGC5, and -1 to -2.5 at BTGC8. Minor increases towards  
401 coarser grain size were observed in the last 2000 years, especially at Tongoy Bay  
402 (BTGC8). In both cases, grain size distributions were strongly leptokurtic. Ca/Fe ratio  
403 also diminished in time, except at core BTGC8 where it was only observed during the  
404 last ~2300 years. The diminishing of the Ca/Fe ratio is due to a decrease in Ca content  
405 mainly but also because of a slight increase in Fe within the sediments (Figs. 6a, 6b).

406

### 407 **4.3. Biogenic components**

#### 408 **4.3.1. Siliceous microfossils and biogenic opal**

409 Total diatom abundance fluctuated between  $5.52 \times 10^5$  and  $4.48 \times 10^7$  valves  $\text{g}^{-1}$  in core  
410 BGGC5. Total diatom abundance showed a good correlation with biogenic opal content  
411 at BGGC5 ( $R^2 = 0.52$ ,  $P < 0.5$ ), with the highest values from 72–74 cm to the bottom of  
412 the core, corresponding to cal BC 3390–3790. In contrast, diatom abundance and  
413 biogenic opal were much lower in core BTGC8 ( $< 2 \times 10^5$  valves  $\text{g}^{-1}$  and  $< 3\%$ ,  
414 respectively). Here, the siliceous assemblage was almost completely conformed by  
415 *Chaetoceros* resting spores (RS) (Fig. 7).

416 A total of 135 and 8 diatom taxa were identified in cores BGGC5 and BTGC8  
417 respectively, where the core BTGC8 registered very low abundances of diatoms. In  
418 general, diatoms were the most important assemblage of siliceous microfossils (96%),  
419 followed by sponge spicules (3%). The contribution of phytoliths and chrysophyte cysts  
420 was less than 2% in core BGGC5. *Chaetoceros* (RS) dominated the diatom assemblage  
421 (~90%; Fig. 7), and included the species *C. radicans*, *C. cinctus*, *C. constrictus*, *C.*  
422 *vanheurckii*, *C. coronatus*, *C. diadema*, and *C. debilis*. Other species recorded of  
423 upwelling group (mainly in core BGGC5) were: *Skeletonema japonicum*, and  
424 *Thalassionema nitzschioides* var. *nitzschioides* (Table S2). Freshwater diatoms  
425 (*Diploneis papula*, *Cymbella tumida*, *Fragilaria capucina*, *Diatoma elongatum*) and  
426 non-planktonic diatoms (*Cocconeis scutellum*, *C. costata* and *Gramatophora angulosa*)  
427 accounted for ~0.1–5%; while the group of coastal planktonic diatoms accounted for  
428 ~0.3–6% of the total assemblage. The main planktonic diatoms were (*Rhizosolenia*  
429 *imbricata*, and *Thalassiosira eccentrica*). Oceanic-warm diatoms (*Roperia tessellata*,  
430 *Th. nitzschioides* var. *inflatula*) and the tytoplanktonic diatom group were rare with less  
431 than 1%.

432

### 433 **4.3.2. TOC and stable isotopes distribution**

434 Consistent with opal and diatoms, core BGGC5 showed higher values of TOC  
435 (between 2 % and 5 %) compared with less than ~1.5 % in core BTGC8 (Fig. 5a,b).  
436 Furthermore,  $\delta^{13}\text{C}$  was slightly higher at core BTGC8 (-20 ‰ to -21 ‰) compared  
437 with core BGGC5 (-21 ‰ to -22 ‰), the former also showing slightly increased  
438 values of  $\delta^{15}\text{N}$  from the deeper sections to the surface of the core (<7 ‰ to >10 ‰).  
439 This increase was less evident at core BGGC5, with values of ~9 ‰ at depth to >10 ‰  
440 on the surface (Fig. 5a,b). Diminishing TOC contents was related to slightly higher  
441  $\delta^{13}\text{C}$  values (~ -20 ‰) in both cores.

442

### 443 **4.3.3. Pollen record**

444

445 Initial surveys on core BTGC8 (Tongoy Bay) revealed extremely low pollen  
446 abundances which hampered further palynology work. A comprehensive pollen  
447 analysis was only conducted for core BGGC5 (Guañaqueros Bay). The pollen record  
448 of core BGGC5 consisted of 29 samples shown in Figure 8. The record was divided in  
449 five general zones following visual observation of changes in the main pollen types  
450 and also assisted by the cluster analysis CONISS.

451 Zone BG-1 (cal BP 8450 – 8000): This zone is dominated by the herbaceous taxa  
452 Chenopodiaceae, *Leucheria*-type, Asteraceae subfamily (subf.) Asteroideae, Apiaceae  
453 with overall high values of the wetland genus *Typha* spp.

454 Zone BG-2 (cal BP 8000 – 6850): This zone is also dominated by Chenopodiaceae,  
455 *Leucheria*-type and Asteraceae subf. Asteroideae. In addition, other non-arboreal  
456 elements such as *Ambrosia*-type, Poaceae, Brassicaceae and *Chorizanthe* spp. expand  
457 all considerably.

458 Zone BG-3 (cal BP 6850 – 3750): This zone is marked by a steady decline in  
459 Chenopodiaceae and *Leucheria*-type, and by the expansion of several other  
460 herbaceous elements, such as Euphorbiaceae, *Baccharis*-type and Brassicaceae.

461 Zone BG-4 (cal BP 3750 – 250): This zone is mostly dominated by Ast. subf.  
462 Asteroideae, and marked by the decline of Chenopodiaceae and *Leucheria*-type. Other  
463 coastal taxa such as Euphorbiaceae, *Baccharis*-type, Asteraceae subf. Chichorioideae,  
464 *Quillaja saponaria*, Brassicaceae and *Salix* spp. also expand in this zone.

465 Zone BG-5 (cal BP 250 – -60): The upper portion of the record is dominated by  
466 Asteraceae subf. Asteroideae and Poaceae, and marked by increments of Geraniaceae,  
467 Asteraceae subf. Mutisieae, Myrtaceae and *Q. saponaria*. Additionally, this zone  
468 includes introduced pollen types such as *Rumex* spp. and *Pinus* spp. The latter is not  
469 shown in the diagram of Figure 8 because its abundance was minimal.  
470 Overall, the most distinctive trend revealed in core BGGC-5 is a long-term decrease in  
471 Chenopodiaceae and increments in Euphorbiaceae and Asteraceae subf. Asteroideae.  
472 Along with these changes, a later expansion of several other pollen representatives of  
473 the coastal shrubland vegetation started at around cal BP 6850.

474

#### 475 **4.4. Trace element distributions**

476 Trace element distributions are shown in figures 6a and 6b for Guanaqueros (BGGC5)  
477 and Tongoy Bays (BTGC8), respectively. Trace metals sensitive to the presence of  
478 oxygen (U, Re, Mo) showed increasing metal/Al ratios from the base of the core (cal  
479 BP ~8400) until cal BP 6700 in core BGGC5. After this maximum, ratios presented a  
480 slight increase towards cal BP 2000 close to the beginning of the recent era, followed  
481 by a sharp decrease until present. Similarly, the metal ratios in the core BTGC8  
482 increase over time, yet the maximum was observed at cal BP 1100. The exception of  
483 this trend was Mo which exhibited maximum values until cal BC 6700 and then a  
484 steady decrease towards the present. Additionally, metal/Al values were higher at core  
485 BGGC5. Iron displayed a clear increase around cal BP 4100 – 3600 at both cores.  
486 Manganese did not show any clear trend.

487 A second element group (metal/Al ratios), including Cd, Ni and P (related to primary  
488 productivity and organic fluxes), showed a similar pattern than Mo/Al towards the  
489 bottom of core BGGC5, i.e. the highest values around cal BP 6700 and a constant  
490 reduction towards the present. A third group, consisting of Ba, P and Ca, exhibited a  
491 less clear pattern. The Cd/Al and Ni/Al ratios in core BTGC8 showed only slightly  
492 decreasing values, and the maximum values were very low compared to the BGGC5  
493 core. The same pattern is observed for other elements. Metal/Al ratios for Ba, Ca and  
494 P were lower and presented a long-term decreasing pattern towards the present.

495 An exception to the previously described patterns was Cu/Al, which peaked at cal BP  
496 4100 and showed a conspicuous increase in the past ~150 years. This was also  
497 observed at core BTGC8, but with lower concentrations than at core BGGC5.

498

## 499 **5. Discussion**

### 500 **5.1. Sedimentary composition of the cores: terrestrial *versus* biogenic inputs**

501 The sediments in the southern zones of the bays constitute a sink of fine particles  
502 transported from northern areas and the shelf (Fig. 5a, 5b), responding to the water  
503 circulation in the Guanaqueros and Coquimbo Bays described as bipolar, i.e. two  
504 counter-rotating gyres which are counterclockwise to the north and clockwise to the  
505 south (Valle-Levinson and Moraga, 2006). This is the result of the wind and a  
506 coastline shape delimited by two prominent points to the north and south. In the case  
507 of Tongoy Bay (the southernmost bay of the system), circulation shows a different  
508 pattern due to its northern direction compared to Guanaqueros Bay, which opens to the  
509 west. The cyclonic recirculation in Tongoy Bay seems to be part of a gyre larger than  
510 the Bay's circulation (Moraga et al., 2011). This could explain differences in sediment  
511 particle distribution and composition between the bays. At Tongoy Bay, there are less  
512 organic carbon accumulation (< 2 %), siliceous microfossils and pollen (Figs. 5, 7 and  
513 8). Similarly, in Guanaqueros Bay TOC contents are only slightly higher (> 2 %),  
514 especially before cal BP 6000 (~ 4 %). However, sediments there contain enough  
515 microfossils to establish differences in primary productivity periods and also provide a  
516 pollen record evidencing the prevailing environmental conditions.

517 The stable isotopes measured in the study area were in the range of marine  
518 sedimentary particles for southern oceans at low and mid latitudes ( $\delta^{13}\text{C}$ ; -20 ‰ – -24  
519 ‰; Williams 1970; Rau et al., 1989; Ogrinc et. al. 2005), and slightly lower than the  
520 TOC composition at the water column (-18 ‰, Fig. 3). This suggests that the organic  
521 particles that settle on the bottom are a more refractory material (C/N: 9–11),  
522 remineralized during particle transportation and sedimentation. This results in lighter  
523 isotopic compositions, especially at core BTGC8. Furthermore, the  $\delta^{15}\text{N}$  and  $\delta^{13}\text{C}$  of  
524 settled particles are more negative at surface sediments due to a preferential  
525 degradation of molecules rich in  $^{13}\text{C}$  and  $^{15}\text{N}$ , resulting in more negative values and  
526 higher C/N ratios at sediments than in suspended particles (Fig. 3, 5a, 5b). However,  
527 this is also due to the stronger diagenetic reactions observed near the bottom layer  
528 (Nakanishi and Minagawa, 2003),. Thus, these sediments are composed by winnowed  
529 particles transported by water circulating over the shelf, and the isotopic variations  
530 should not establish clearly the contribution of terrestrial inputs.



531 Otherwise, the isotopic composition of upwelled NO<sub>3</sub> (De Pol-Holz et al., 2007) could  
532 influence the variability of δ<sup>15</sup>N. Values for δ<sup>15</sup>N at northern and central Chile are in  
533 the range of those measured at BGGC5 core (~11‰; Hebbeln et al., 2000, De Pol-  
534 Holz et al., 2007), resulting by the isotopic fractionation of NO<sub>3</sub> during nitrate  
535 reduction within OMZ leaving a remnant NO<sub>3</sub> enriched in <sup>15</sup>N (Sigman et al., 2009;  
536 Ganeshram et al., 2000 and references therein). In this case, the BGGC5 core  
537 sediments represent the effect of the nutrient supply by the upwelling and the  
538 influence of the OMZ over the shelf resulting in δ<sup>15</sup>N of 9 – 10‰. At BTGC8  
539 sediment core, lower values (<8‰) at greater depths within the core should represent  
540 the mixing with light terrestrial organic material (Sweeney and Kaplan, 1980), due to  
541 the nearest position of a permanent small wetland at southern site of Tongoy Bay.  
542 Pachingo wetland material showed δ<sup>15</sup>N of 1 – 8‰ (Muñoz et al., data will be  
543 published elsewhere) in the range of sedimentary environments influenced by  
544 terrestrial runoff (Sigman et al., 2009). At most of the cases, lower TOC is  
545 correspondingly with lighter δ<sup>15</sup>N values, and also with the highest C/N ratios (Fig.  
546 5b).

547 Magnetic susceptibility (MS) measurements revealed lower values throughout both  
548 cores (BGGC5: 5 – 8 x10<sup>-8</sup> SI; BTGC8: 12 – 20 x10<sup>-8</sup> SI), except at dates of the last  
549 ~100 years (CE 1800), when it increases substantially to values similar to those  
550 observed in the Pachingo wetland (40 – ~200 x10<sup>-8</sup> SI; unpublished data) on the  
551 southern side of Tongoy Bay. Magnetite has strong response to magnetic fields and its  
552 concentration is considered proportional to magnetic susceptibility (Dearing, 1999).  
553 Additionally, mineral post-depositional transformations (alteration of magnetite  
554 minerals) and dilution by biogenic components (carbonates, silicates) should also be  
555 relevant in the MS intensity in zones with high organic accumulation rates (Hatfield  
556 and Stoner, 2013). However, this is not expected to be the case for our cores and the  
557 MS should be mainly accounting for the source of the particles. The highest MS  
558 measurements on surface sediments would indicate a greater contribution of terrestrial  
559 material. The area is surrounded by several creeks that are only active during major  
560 flooding events, with greater impacts on Tongoy Bay compared to Guanaqueros Bay.  
561 An important increment in the contribution of terrestrial material has occurred in  
562 Tongoy Bay in recent times (Ortega et al., in review), which is diluting organic proxy  
563 records and increasing the grain size. Our records indicate a slight increase in mean

564 grain size at both bays, supported also by a slight decrease in Ca/Fe ratio indicating  
565 more Fe input from continental erosion (Fig. 5a, 5b).

566 Recent information indicates that during the intensification of southern winds the  
567 upwelling develops a nutrient-rich and low-oxygen flow within the bay's southern  
568 areas (Gallardo et al., 2017), which promotes phytoplankton blooms and low oxygen  
569 events. Decreasing concentrations of Ca from the deepest part of both cores to the  
570 surface was interpreted as decreasing primary productivity (Keshav and Achyuthan,  
571 2015; Sun et al., 2016), but higher concentrations were measured in core BGGC5  
572 compared with core BTGC8, where more terrestrial influence is being suggested. The  
573 slight increase of K/Ca ratio in time, from bottom to the surface, should also be  
574 interpreted as a slight increase in continental input, since K is related to siliciclastic  
575 material from coastal erosion, fluvial and groundwater inputs. However, the variation  
576 of Ca was larger (Fig.6a, 6b), resulting in higher K/Ca ratios at the surface. This  
577 indicating that the continental input has not changed much in time but rather the  
578 primary productivity has decreased (Fig. 5a, 5b).

579

## 580 **5.2. Temporal variability of proxies for primary productivity**

581 Several elements participating in phytoplankton growth are useful to interpret  
582 variations in primary productivity in time, as they are preserved in the sediments under  
583 suboxic-anoxic conditions. This produces enrichment over crustal abundance, which  
584 distinguishes them from continental inputs. The presence of free dissolved sulfides  
585 produced by sulfate reduction reactions in the diagenesis of organic matter allows for  
586 the precipitation of metals on the pore water (Calvert and Pedersen, 1993; Morse and  
587 Luther, 1999). At the same time, organic matter remineralization releases ions to the  
588 pore water where they could form organic complexes and insoluble metal sulfides.  
589 Conversely, they could be incorporated into pyrite as Cd, Ni and Cu, showing  
590 different degrees of trace metal pyritization (Huerta-Diaz and Morse, 1992). Ca, Sr,  
591 Cd and Ni profiles suggest a lower proportion of organic deposition in time (Fig. 6a,  
592 6b), consistent with the slight reduction of TOC content observed in the sediments  
593 (Figs. 5a, 5b), and concomitantly with other elements related to organic fluxes to the  
594 bottom and primary productivity. In the case of Ba, it is actively incorporated into  
595 phytoplankton biomass or adsorbed onto Fe oxyhydroxides, increasing the Ba flux  
596 towards the sediments, where it is also released during organic matter diagenesis. Ba is  
597 precipitating in microenvironments where Ba-sulfate reaches supersaturation

598 (Tribovillard et al., 2006 and references therein), but it is dissolved in suboxic-anoxic  
599 environments or where sulfate is significantly depleted (Torres et al., 1996; Dymond  
600 et al., 1992). Therefore, it is better preserved in less anoxic environments with  
601 moderate productivity, expected to be the case of our study site (Gross Primary  
602 Productivity = 0.35 to 2.9 g C m<sup>-1</sup>d<sup>-1</sup>; Daneri et al., 2000). Hence, the slight increase of  
603 Ba from cal BP 4000 (Fig. 6a) to the present should rather be the response to a less  
604 anoxic environment than to an increase in primary productivity. This is consistent with  
605 the reduction in TOC and other nutrient-type elements (Ni, Sr, Ca, Cd), and results in  
606 a low negative correlation with TOC (-0.59; Table 4) due to the Ba remobilization in  
607 anoxic conditions around cal BP 6700. On the other hand, P distribution showed a  
608 trend similar to that of TOC and other elements related to organic fluxes to the bottom  
609 (Ni, Cd), although with a lower correlation (~0.6). The accumulation of P depends on  
610 the deposition rate of organic P (dead plankton, bones and fish scales) to the bottom,  
611 and is actively remineralized during aerobic or anaerobic bacterial activity. Dissolved  
612 P diffuses towards the water column where part of it could be adsorbed onto Fe oxides  
613 that maintain this element within the sediments. P is buried during a continued  
614 sedimentation process and could be released to the pore water under anoxic  
615 conditions, when oxides are reduced, creating the environmental conditions for  
616 phosphorite and carbonate-fluorapatite precipitation. Normally, this takes place in sites  
617 with high sedimentation rates and high organic matter fluxes to the bottom (Filippelli,  
618 1997; Cha et al., 2005), which was not the case for our study area (<0.02 cm yr<sup>-1</sup>). In  
619 spite of this difference, P and TOC showed a decreasing trend towards the present,  
620 suggesting reducing flux of organic matter over time, which was also observed for Ni  
621 and Cd distributions. Alternatively, it could be explained by the increased  
622 remineralization of the organic material settled on the bottom (Figs. 6a, 6b).

623 Productivity reconstructions were based on diatom relative abundances and biogenic  
624 opal content only in core BGGC5, since core BTGC8 registered valve counts that  
625 were too low (<1% in relative diatom abundance). However, at both cores diatom  
626 assemblages were represented mainly by *Chaetoceros resting spores*, which are used  
627 as upwelling indicators, showing increased concentrations during periods of high  
628 productivity and upwelling (Abrantes 1988, Vargas et al., 2004). In addition,  
629 *Chaetoceros* resting spores are highly silicified and well preserved in coastal  
630 sediments (Blasco et al., 1981). The downcore siliceous productivity based on opal  
631 distribution (Fig. 7) distinguished three main periods of increased productivity: (1) >

632 cal BP 6500, (2) cal BP 2000 – cal BP 4600 and (3) recent time (CE 2015) – cal BP  
633 ~260. The mean opal accumulation rate in the second period was  $11.8 \pm 4.8 \text{ g m}^2 \text{ yr}^{-1}$ ,  
634 when spicules and minerals (quartz, framboid pyrite) were abundant in smear slides.  
635 During the first period, accumulation increased noticeably to  $\sim 30.1 \pm 14.5 \text{ g m}^2 \text{ yr}^{-1}$ ,  
636 when the *Chaetoceros* spores were predominant, indicating upwelling intensification  
637 and low spicules and minerals were observed in the slides. This is partially consistent  
638 with the nutrient–type element distributions. Although the third period was too short,  
639 high opal accumulation and high Cd/U ratios could also be observed, which increased  
640 toward the present (mean opal value of  $32.3 \pm 22.4 \text{ g m}^2 \text{ yr}^{-1}$ ). Similarly, Cu and Fe  
641 also increased in recent times (Fig. 6a), contributing to fertilize the environment and  
642 promoting primary productivity. The second period was not clearly identified in terms  
643 of metals, except for Fe which shows a conspicuous increment in this period (Fig. 6a).  
644 During the first period, all metal proxies showed primary productivity increases before  
645 cal BP 6500, as indicated by opal accumulation within the sediments. In anoxic-  
646 suboxic environments Cd/U ratios could vary between 0.2 and 2 (Nameroff et al.,  
647 2002), the high concentrations of both elements reflect anoxic conditions but their  
648 different behavior could result in variable Cd/U ratios in suboxic environments. Here,  
649 the Cd and U accumulation on sediments resulted in high Cd/U ratios ( $>2$ ; Fig. 7)  
650 during periods with high opal accumulation in the cores, especially in the first period,  
651 and even in core BTGC8; and lower ratios ( $< 1$ ; Fig. 7) when opal was low, indicating  
652 higher variations in the primary productivity in time with moderated changes in  
653 oxygen conditions at the bottoms. Opal showed good correlations with Ni and Cd  
654 ( $\sim 0.70$ ; Table 4; Fig. 6a), all suggesting the relevance of bottom organic fluxes for  
655 element accumulation within the sediments, and establishing a clear period of higher  
656 primary productivity around cal BP 6500, when lowest oxygen conditions prevailed  
657 (Fig. 7).

658

### 659 **5.3. Temporal variability of proxies for bottom water oxygenation**

660 U, Re and Mo distributions in core BGGC5 indicate that anoxic or suboxic conditions  
661 were developed from cal BP 8400 to ~ cal BP 2000. After this period and towards the  
662 present, however, a remarkable reduction in their concentration suggests a more  
663 oxygenated bottom environment, concurrent with lower organic fluxes to the  
664 sediments. The Re profile shows the influence of suboxic waters not necessarily  
665 associated with increased organic matter fluxes to the bottom. Since this element is not

666 scavenged by organic particles, its variability is directly related to oxygen changes  
667 (Calvert and Pedersen, 2007, and references therein). Additionally, it is strongly  
668 enriched above crustal abundance in suboxic conditions (Colodner et al., 1993;  
669 Crusius et al 1996), being >10 times in core BGGC5 (Table S3) before cal BP 2000.  
670 In the same way, U exhibits a similar pattern, and although organic deposition has an  
671 impact on its distribution (Zheng et al., 2002), it also relates to changes in bottom  
672 oxygen conditions. This is because its shift from a soluble conservative behavior to  
673 non-conservative and insoluble behavior solely depends on the redox potential change  
674 that occurs near the Fe(III) reduction zone (Klinkhammer and Palmer, 1991).  
675 Molybdenum, which showed high increases at cal BP 6700, also indicates the  
676 presence of sulfidic conditions, as shown by the Re distribution highly enriched in  
677 anoxic environments (Colodner et al., 1993), and by the reduction of Re(VII) to  
678 Re(IV) forming  $\text{ReO}_2$  or  $\text{ReS}$  (Calvert and Pedersen, 2007). Rhenium, U and Mo  
679 enrichment are used to decipher the redox condition within the sediments, even in  
680 places with high lithogenic input that could obscure the authigenic enrichment of other  
681 elements under similar conditions (Crusius et al., 1996). In both places, the  
682 concentrations of these elements showed values above the crustal abundance,  
683 especially in core BGGC5 (Table S3), with Re and Mo becoming more enriched (>13)  
684 than U (~ 5), except at recent time that diminish drastically. This suggests that the  
685 presence of anoxic conditions were stronger around cal BP 6300 – 7200 with a peak at  
686 cal BP 6700. The most important enrichment was observed for Cd (> 30) but higher  
687 before cal BP 6300 (~147) (Table S3), which could similarly indicate the sulfidic  
688 condition within the sediments that allows Cd precipitation. It is also supported by Mo  
689 enrichment, since its accumulation within the sediments is highly controlled by sulfide  
690 concentrations (Chaillou et al., 2002; Nameroff et al., 2002; Sundby et al., 2004).  
691 Something similar occurs in Tongoy Bay (core BTGC8), but trace metal  
692 concentrations are lower for all elements and also for TOC, suggesting that it has  
693 limited influence on metal accumulation within the sediments. Thus, these elements  
694 suggest anoxic conditions within the sediments in both places around cal BP 6700 –  
695 7200 (Fig. 6a, 6b). After this period, a second maximum but less intense anoxia is  
696 observed at the beginning of the recent era (cal BP 2000), continuing with a  
697 conspicuous oxygenation until present times. This interpretation based on the  
698 distribution of U, Re and Mo complements the observations of nutrient-type elements  
699 pointing both to oxygenation changes and to changes in organic fluxes through the

700 sediments. A less prominent accumulation of nutrient-type elements (Ni, Cd, Ba, Ca  
701 and P) would indicate lower organic material deposition to the sediments but  
702 promoting anoxic conditions within the sediments and lower sulfide content with time,  
703 which are nevertheless high enough to sustain Mo accumulation until cal BP 2000.  
704 After that, a notorious decrease in Re, U and Mo accumulation was observed,  
705 suggesting that the oxygenation of the bottom becomes relevant. This could also  
706 explain the conspicuous increase of Cu/Al and Fe/Al in recent times due to the  
707 presence of oxides (Fig. 6a, 6b). Apparently, a low level of dissolved Cu is maintained  
708 by the complexation with organic compounds produced by phytoplankton and Cu  
709 adsorption on Fe oxides (Peacock and Sherman, 2004; Vance et al., 2008; Little et al.,  
710 2014), with both processes increasing Cu in the particulate phase over surface  
711 sediments. At our study sites, Fe and Cu concentrations were higher in surface  
712 sediments, probably related to an increase in Fe and Cu availability in the environment  
713 (Fig. 6a, 6b). This could be in turn associated with mining activities carried out in the  
714 area since the beginning of cal BP 50 (CE 1900's).

715 At present, the suboxic conditions within the bays result from the influence of adjacent  
716 water masses with low oxygen contents, related to the oxygen minimum zone (OMZ)  
717 (Fig. 2) centered at ~250 m. Upwelling promotes the intrusion of these waters towards  
718 the bays, with strong seasonality. Transition times develop in short periods by changes  
719 in wind directions and intensities along the coast. Additionally, oceanic variability  
720 along the western coast of South America is influenced by equatorial Kelvin waves on  
721 a variety of timescales, from intraseasonal (Shaffer et al., 1997) and seasonal (Pizarro  
722 et al., 2002; Ramos et al., 2006) to interannual (Pizarro et al., 2002; Ramos et al.,  
723 2008). Coastal-trapped Kelvin waves originating from the equator can propagate along  
724 the coast, modify the stability of the regional current system and the pycnocline, and  
725 trigger extratropical Rossby waves (Pizarro et al., 2002; Ramos et al., 2006; 2008).  
726 This oceanographic feature will generate changes in oxygen content within the bays  
727 with major impacts on redox sensitive elements in surface sediments; thus, the  
728 increased frequency and intensity of this variability would result in a mean effect  
729 which is observed as a gradual change in metal contents in time.

730

#### 731 **5.4. Climatic interpretations**

732 The present-day climate of the semi-arid region of Chile is largely influenced by the  
733 position of the Southeast Pacific Subtropical Anticyclone (SPSA) and latitudinal

734 displacements of the Southern Westerly Winds (SWW). The dynamic of these large-  
735 scale atmospheric systems, from seasonal to decadal timescales, control the amount of  
736 precipitation that reaches this region. Because the semi-arid region of Chile represent  
737 the northernmost area under the influence of the SWW, precipitation is relatively scarce  
738 and restricted to the austral winter months when the SPSA and SWW shift northwards,  
739 bringing precipitation fronts to the semiarid coast and the interior land (Montecinos and  
740 Aceituno, 2003; Quintana and Aceituno, 2012).

741 In accordance with the modern climatology, paleoenvironmental records from the  
742 semiarid region have mostly been interpreted to reflect past variability in the intensity  
743 and latitudinal position of the SWW. In this regard, the Holocene period features a  
744 series of wet and dry phases resulting from millennial-scale SWW changes (Hebbeln et  
745 al., 2002; Lamy et al., 1999; Maldonado and Villagrán, 2002). In particular, pollen  
746 records from the southern coastal areas of Coquimbo (32°S) indicate that wet conditions  
747 predominated before cal BP 8700, which brought the expansion of swamp forests areas  
748 along the coast (Maldonado and Rozas, 2008; Maldonado and Villagrán, 2006). This  
749 wet period was followed by a long-lasting arid phase between cal BP 8700 and 5700.  
750 Regional aridity matches the relative dry conditions detected in the first portion of our  
751 pollen reconstruction from core BGGC5 in the Guanaqueros Bay, which is represented  
752 by relative low values of the Pollen Moisture Index in Fig. 9. Similarly, a general  
753 increase in regional precipitation after cal BP ~6000, observed in pollen records from  
754 the northern margin of SWW (Jenny et al., 2003; Maldonado and Villagrán, 2006) is  
755 broadly correlated with the observed long-term trend towards increased precipitation  
756 observed in the Pollen Moisture after cal BP ~6850. This is also in agreement with Al  
757 and Pb, usually considered to be indicators of continental particles that enter to marine  
758 waters by fluvial or aerial transport (Calvert and Pedersen, 2007; Govin et al., 2012;  
759 Ohnemus and Lam, 2015; Saito et al., 1992; Xu et al., 2015). In our cores, these  
760 elements showed trend similar to the pollen record, i.e., a gradual rise in time,  
761 suggesting increased humid conditions during recent periods (Fig.9).

762 In addition, our records indicate long-term increases in grain size and K/Ca ratios and  
763 Fe over the last ~8000 years. These increases point to a higher continental inputs most  
764 probably caused by increasing rainfall events, which are an important source of sands  
765 and K in the northern Chilean margin at the present. Increments of Fe have been  
766 documented to provide a boost in primary productivity analyzed in sedimentary records  
767 (Dezileau et al., 2004). In our cores, a short-term increase in Fe concentrations is

768 observed between cal BP ~4100 –3600 at the Guanaqueros core, whereas persistent  
769 high values are recorded in the Tongoy core between cal BP 7800 – 6500. These two  
770 increases coincide with periods with relatively high primary productivity based on the  
771 diatoms and opal distribution. This correlation supports the role of Fe as promoter of  
772 coastal productivity in the past. However, we note that maximum productivity observed  
773 at cal BP ~6700 seems at odd with the overall dry environmental conditions evidence by  
774 the pollen data. An explanation for this discrepancy is that dry conditions were more  
775 likely associated with increases in SPSH activity in the region and consequently with  
776 higher upwelling (Frugone- Álvarez et al., 2017). The subsequent weakening in  
777 paleoproductivity after cal BP 6000 can be explained by a reduction in upwelling due to  
778 reduced SPSH activity and by the intrusion of less nutrient-enriched upwelled waters  
779 over the shelf, influenced by remote equatorial waves, as it is observed today.

780 The synchronism between highest productivity and dry conditions prior to ~cal BP 6700  
781 highlights the role of the SPSA as an important driver of paleoproductivity changes in  
782 the coast of semi-arid Chile during the early portion of the Holocene Period. On the  
783 other hand, the pollen and trace element record show both a coherent pattern of  
784 increasing humidity and continental discharge over the last 7000 years. The driver of  
785 this long-term paleoclimate trend seems to be associated with past shifts in the position  
786 of the SWW. In particular, an equatorial displacement of the SWW during mid and later  
787 part of the Holocene period, has been suggested by reconstructions from terrestrial and  
788 marine proxies (Veit, 1996; Lamy et al., 1999; Lamy et al. 2010).

789 Studies of coastal upwelling from the Central Peruvian and south Central Chilean coasts  
790 (12 – 36 °S) show that present-day wet/dry variability associated with El Niño Southern  
791 Oscillation exert an important influence on the bottom ocean oxygenation (Escribano et  
792 al., 2004; Gutiérrez et al., 2008; Sellanes et al., 2007). In this regard, OMZs is expected  
793 to be less intense during warm El Niño phases and vice versa. This link has been  
794 observed by recent studies, as warm events in the Tropical Pacific tend to be associated  
795 with low productivity and weak OMZ in the Peruvian coast (Salvatteci et al., 2014). An  
796 increase in the frequency of ENSO-like warm events could, therefore, explain the  
797 reduction in productivity recorded after cal BP 6700 in our records. In this case, warm  
798 events in the eastern Pacific could have reduced the ocean productivity and organic  
799 fluxes from primary productivity and overall dropping oxygen consumption during  
800 organic matter diagenesis. In the light of these mechanisms, our results suggest more El  
801 Niño-like conditions during the latter part of the Holocene, an inference that is



802 consistent with the available evidence for an increase in the frequency of El Niño events  
803 over the last 4000–5000 years (Conroy et al., 2008; Moy et al., 2002). We further note  
804 that present-day El Niño years are generally connected with increased westerly flow  
805 over central Chile including the semi-arid region (Montecinos and Aceituno, 2003), and  
806 therefore more frequent El Niño states during the latter part of the Holocene are also  
807 consistent with a long-term increase in precipitation revealed by the pollen and trace  
808 element data.

809

## 810 **6. Conclusions**

811 Our result indicates that the ocean circulation at our study sites seems to affect both  
812 places differently, leaving more variable grain compositions and higher TOC contents  
813 in the Guanaqueros Bay (core BGGC5) than in the Tongoy Bay (core BTGC8). This  
814 difference should be interpreted as an increase in the time of particle transportation  
815 resulting in grain size selection (more leptokurtic at core BTGC8), especially after cal  
816 BP 2000. Furthermore, in both bays, constantly decreasing TOC contents were  
817 observed after cal BP ~4000 to the present, probably due to higher oxygenation of the  
818 bay bottom in time.

819 Differences in redox conditions in our records could be reconstructed in detail,  
820 showing a clear decreasing trend in oxygen bottoms before the beginning of recent  
821 time (cal BP ~2000), followed by a rapid change to a more oxygenated environment.  
822 The environmental conditions at bottom waters was essential in the metal enrichment  
823 factor above crustal abundance within the sediments (highest EFs), since low organic  
824 carbon accumulation and low sedimentation rates have been estimated, indicating that  
825 the accumulation of these elements (U, Mo and Re) depends mainly on oxygen  
826 content instead of on organic carbon burial rates. Our result suggest that a maximum  
827 suboxia-anoxia occurred at cal BP ~6700, when peak U and Re where recorded,  
828 probably due to the presence of a sulfidic environment.

829 The nutrient-type elements follow a similar trend, reduced at present and showing  
830 higher accumulation rates around cal BP 6700 (Ca, Ni, P and Cd). Their distribution is  
831 consistent with the diatom and opal distributions, showing their dependence on primary  
832 productivity and organic carbon burial rates. If the kinetics reaction is working at low  
833 rates for these elements, they should be highly influenced during oxygenation periods,  
834 something that seems to have been operating at higher frequencies.

835 The record of continental proxies suggests a long-term increase in precipitation,  
836 consistent with previous reconstructions in central Chile. The most distinctive changes  
837 were observed after cal BP 6500 – 6700 when an overall expansion of the coastal  
838 vegetation occurred as a result of a progressive increase in precipitation and river  
839 runoffs, expanding the grain size of the sediments and the higher concentrations of  
840 elements with an important continental source (Al, Fe, K and Pb).  
841 Increased regional precipitations amounts have been commonly interpreted by a  
842 northward shift of the Southern Westerly Winds belts, yet the increased frequency of  
843 El Niño events did more likely introduce a high variability of humidity after cal BP  
844 5000. Thus, the apparent increase of oxygen conditions at bottoms could have been the  
845 result of this oceanographic feature, which introduced a more oxygenated water mass  
846 to the shelf and bays, temporarily changing the redox conditions in surface sediments  
847 and affecting the sensitive elements to redox potential change in the environment.  
848 Additionally, this also affected the accumulation of organic matter due to an  
849 intensification of its remineralization, showing a decreasing trend in nutrient type  
850 element accumulation and organic carbon burial rates towards the present.  
851 Finally, our results suggest that the geochemistry and sedimentary properties of  
852 coastal shelf environments in North-central Chile have changed considerably during  
853 the Holocene period. In particular, decreasing trends in primary productivity highlight  
854 the sensitivity of these environments to regional climate changes at different  
855 timescales. Future changes are therefore likely to be expected in the ongoing scenario  
856 of environmental changes at unprecedented rates.

857

## 858 **7. References**

859 Abrantes, F.: Diatom assemblages as upwelling indicators in surface sediments off  
860 Portugal, *Mar. Geol.*, 85(1), 15–39, doi:10.1016/0025-3227(88)90082-5, 1988.

861

862 Ancapichún, S., Garcés-Vargas, J.: Variability of the Southeast Pacific Subtropical  
863 Anticyclone and its impact on sea surface temperature off north-central Chile  
864 Variabilidad del Anticiclón Subtropical del Pacífico Sudeste y su impacto sobre  
865 la temperatura superficial del mar frente a la costa centro-norte de Chile, *Cienc. Mar.*,  
866 41(1), 1–20, <http://dx.doi.org/10.7773/cm.v41i1.2338>, 2015.

867

868 Appleby, P. G. and Oldfield, F.: The calculation of lead-210 dates assuming a constant  
869 rate of supply of unsupported<sup>210</sup>Pb to the sediment, *Catena*, 5(1), 1–8,  
870 doi:10.1016/S0341-8162(78)80002-2, 1978.  
871

872 Behrenfeld, M. J., O'Malley, R. T., Siegel, D. A., McClain, C. R., Sarmiento, J. L.,  
873 Feldman, G. C., Milligan, A. J., Falkowski, P. G., Letelier, R. M. and Boss, E. S.:  
874 Climate-driven trends in contemporary ocean productivity, *Nature*, 444(7120), 752–  
875 755, doi:10.1038/nature05317, 2006.  
876

877 Bevington, P. and Robinson, K. (Eds.): Error analysis. In: *Data Reduction and Error*  
878 *Analysis for the Physical Sciences*, WCB/McGraw-Hill, USA, 38–52, 1992  
879

880 Blasco, D., Estrada, M. and Jones, B. H.: Short time variability of phytoplankton  
881 populations in upwelling regions-the example of Northwest Africa. In: *Coastal*  
882 *upwelling*. F. A. Richards (Ed.), AGU Washington DC, 339 – 347, 1981  
883

884 Blott, S. J. and Pye, K.: Gradistat: A Grain Size Distribution and Statistics Package for  
885 the Analysis of Unconsolidated Sediments, *Earth Surf. Process. Landforms*, 26, 1237–  
886 1248, doi:10.1002/esp.261, 2001.  
887

888 Bolin, B.: The carbon cycle and global change: a focus on CO<sub>2</sub>. In: *Trace Gases and the*  
889 *Biosphere*. Moore, B. III and Schimel, D. (Eds.), Boulder: University Corporation for  
890 Atmospheric Research, 129–149, 1992.  
891

892 Calvert, S. E. and Pedersen, T. F.: Geochemistry of Recent oxic and anoxic marine  
893 sediments: Implications for the geological record, *Mar. Geol.*, 113(1–2), 67–88,  
894 doi:10.1016/0025-3227(93)90150-T, 1993.  
895

896 Calvert, S. E. and Pedersen, T. F.: Chapter Fourteen Elemental Proxies for  
897 Palaeoclimatic and Palaeoceanographic Variability in Marine Sediments: Interpretation  
898 and Application, *Dev. Mar. Geol.*, 1(7), 567–644, doi:10.1016/S1572-5480(07)01019-6,  
899 2007.  
900

901 Carré, M., Jackson, D., Maldonado, A., Chase, B.M., Sachs, J.P.: Variability of  $^{14}\text{C}$   
902 reservoir age and air–sea flux of  $\text{CO}_2$  in the Peru–Chile upwelling region during the  
903 past 12,000 years, *Quat. Res.*, 85, 87–93, 2016.

904

905 Merino-Campos, V., De Pol-Holz, R. Southon, J., Latorre, C., Collado-Fabbri, S.:  
906 Marine radiocarbon reservoir age along the Chilean continental margin, *Radiocarbon*,  
907 81, 1–16, doi:10.1017/RDC.2018.81, 2018.

908

909 Cha, H. J., Lee, C. B., Kim, B. S., Choi, M. S. and Rittenberg, K. C.: Early diagenetic  
910 redistribution and burial of phosphorus in the sediments of the southwestern East Sea  
911 (Japan Sea), *Mar. Geol.*, 216(3), 127–143, doi:10.1016/j.margeo.2005.02.001, 2005.

912

913 Chaillou, G., Anschutz, P., Lavaux, G., Schäfer, J. and Blanc, G.: The distribution of  
914 Mo, U, and Cd in relation to major redox species in muddy sediments of the Bay of  
915 Biscay, *Mar. Chem.*, 80(1), 41–59, doi:10.1016/S0304-4203(02)00097-X, 2002.

916

917 Chester, R.: Redox environments and diagenesis in marine sediments, In: *Marine*  
918 *Geochemistry*, Chapman & Hall, 486–524, 1990.

919

920 Colodner, D., Sachs, J., Ravizza, G., Turekian, K. K. and Boyle, E.: The geochemical  
921 cycle of Re: a reconnaissance, *Earth Planet. Sci. Lett.*, 117, 205–221, doi:10.1016/0012-  
922 821X(93)90127-U, 1993.

923

924 Conroy, J.L., Overpeck, J.T., Cole, J.E., Shanahan, T.M., Steinitz-Kannan, M.:  
925 Holocene changes in eastern tropical Pacific climate inferred from a Galápagos lake  
926 sediment record. *Quat. Sci. Rev.*, 27, 1166-1180, 2008.

927

928 Crusius, J., Calvert, S., Pedersen, T. and Sage, D.: Rhenium and molybdenum  
929 enrichments in sediments as indicators of oxic, suboxic and sulfidic conditions of  
930 deposition, *Earth Planet. Sci. Lett.*, 145(1–4), 65–78, doi:10.1016/S0012-  
931 821X(96)00204-X, 1996.

932

933 Cupp, E.E.: Marine plankton diatoms of the west coast of North America, Bulletin of  
934 the Scripps Institution of Oceanography 5, 1–238, 1943.

935

936 Daneri, G., Dellarossa, V., Quiñones, R., Jacob, B., Montero, P. and Ulloa, O.: Primary  
937 production and community respiration in the Humboldt Current System off Chile and  
938 associated oceanic areas, *Mar. Ecol. Prog. Ser.*, 197, 41–49, doi:10.3354/meps197041,  
939 2000.

940

941 Dearing, J., Magnetic susceptibility. In: *Environmental Magnetism: A Practical Guide*.  
942 Walden, J., Oldfield, F., and Smith, J. (Eds.), Quaternary Research Association  
943 Technical Guide No. 6, London, 35–62, 1999.

944

945 De Pol-Holz, R., Ulloa, O., Lamy, F., Dezileau, L., Sabatier, P., and Hebbeln, D.: Late  
946 Quaternary variability of sedimentary nitrogen isotopes in the eastern South Pacific  
947 Ocean, *Paleoceanography*, 22, PA2207, doi: 10.1029/2006 PA001308, 2007.

948

949 Dezileau, L., Ulloa, O., Hebbeln, D., Lamy, F., Reyss, J. L. and Fontugne, M.: Iron  
950 control of past productivity in the coastal upwelling system off the Atacama Desert,  
951 Chile, *Paleoceanography*, 19(3), doi:10.1029/2004PA001006, 2004.

952

953 Dymond, J., Suess, E. and Lyle, M.: Barium in deep-sea sediment: A geochemical  
954 proxy for paleoproductivity, *Paleoceanography*, 7(2), 163–181, 1992.

955 Escribano, R., Daneri, G., Farías, L., Gallardo, V. A., González, H. E., Gutiérrez, D.,  
956 Lange, C. B., Morales, C. E., Pizarro, O., Ulloa, O. and Braun, M.: Biological and  
957 chemical consequences of the 1997-1998 El Niño in the Chilean coastal upwelling  
958 system: A synthesis, *Deep. Res. Part II Top. Stud. Oceanogr.*, 51(20–21), 2389–2411,  
959 doi:10.1016/j.dsr2.2004.08.011, 2004.

960

961 Faegri, K. and Iversen, J.: *Textbook of pollen analysis, IV*. The Blackburn Press, New  
962 Jersey, 328 pp., 1989.

963

964 Filippelli, G. M.: Controls on phosphorus concentration and accumulation in oceanic  
965 sediments, *Mar. Geol.*, 139, 231-240, 1997.

966

967 Flynn, W. W.: The determination of low levels of polonium-210 in environmental  
968 materials, *Anal. Chim. Acta*, 43, 221–227, 1968.

969

970 Frugone-Álvarez, M., Latorre, C., Giralt, S., Polanco-Martínez, J., Bernárdez, P., Oliva-  
971 Urcia, B., Maldonado, A., Carrevedo, M. L., Moreno, A., Delgado Huertas, A., Prego,  
972 R., Barreiro-Lostres, F. and Valero-Garcés, B.: A 7000-year high-resolution lake  
973 sediment record from coastal central Chile (Lago Vichuquén, 34°S): implications for  
974 past sea level and environmental variability, *J. Quat. Sci.*, 32(6), 830–844,  
975 doi:10.1002/jqs.2936, 2017.

976

977 Gallardo, M.A., González, A., Ramos, M., Mujica, A., Muñoz, P., Sellanes, J.,  
978 Yannicelli, B.: Reproductive patterns in demersal crustaceans from the upper boundary  
979 of the OMZ off north-central Chile, *Cont. Shelf. Res.* 141, 26–37, 2017.  
980 <http://dx.doi.org/10.1016/j.csr.2017.04.011>

981

982 Ganeshram, R.S., Pedersen, T. F., Calvert, S.G., McNeill, G., Fontugne, M.: Glacial-  
983 interglacial variability in denitrification in the world's oceans: Causes and  
984 consequences. *Paleoceanography*, 15(4), 361– 376, 2000.

985

986 Garreaud, R. and Rutilant, J.: Análisis meteorológico de los aluviones de Antofagasta y  
987 Santiago de Chile en el período 1991–1993, *Atmósfera*, 9, 251–271, 1996.

988

989 Garreaud, R., Vuille. M., Compagnucci, R. and Marengo, J.: Present-day South  
990 American climate, *Palaeogeogr. Palaeocl.*, 281, 180-195,  
991 doi:10.1016/j.palaeo.2007.10.032

992

993 González, H. E., Daneri, G., Figueroa, D., Iriarte, J., Lefèvre, N., Pizarro, G., Quiñones,  
994 R., Sobarzo, M. and Troncoso, A.: Producción primaria y su destino en la trama trófica  
995 pelágica y océano profundo e intercambio océano-atmósfera de CO<sub>2</sub> en la zona norte de  
996 la Corriente de Humboldt (23° S): posibles efectos del evento El Niño 1997. *Rev. Chil.*  
997 *Hist. Nat.*, 71, 429-458, 1998.

998

999 Govin, A., Holzwarth, U., Heslop, D., Ford Keeling, L., Zabel, M., Mulitza, S., Collins,  
1000 J. A. and Chiessi, C. M.: Distribution of major elements in Atlantic surface sediments

1001 (36°N-49°S): Imprint of terrigenous input and continental weathering, *Geochemistry,*  
1002 *Geophys. Geosystems*, 13(1), 1–23, doi:10.1029/2011GC003785, 2012.

1003

1004 Guieu, C., Martin, J. M., Tankéré, S. P. C., Mousty, F., Trincerini, P., Bazot, M., Dai,  
1005 M. H.: On trace metal geochemistry in the western Black Sea: Danube and shelf area.  
1006 *Estuarine, Coastal and Shelf Science*, 47, 471–485, 1998.

1007

1008 Gitiérrez, D., Sifedine, A., Reyss, J.L., Vargas, G., Velazco, F., Salvattci, R., Ferreira,  
1009 V., Ortlieb, L., Field, D., Baumgartner, T., Boussafir, M., Boucher, H., Valdés, J.,  
1010 Marinovic, L., Soler, P., Tapia, P.: Anoxic sediments off Central Peru record  
1011 interannual to multidecadal changes of climate and upwelling ecosystem during the last  
1012 two centuries, *Adv. Geosci.* 6, 119–125, 2006.

1013

1014 Gutiérrez, D., Enríquez, E., Purca, S., Quipuzcoa, L., Marquina, R., Flores, G. and  
1015 Graco, M.: Oxygenation episodes on the continental shelf of central Peru: Remote  
1016 forcing and benthic ecosystem response. *Prog. Oceanogr.*, 79, 177–189, 2008.

1017

1018 Gutiérrez, D., Sifeddine, A., Field, D. B., Ortlieb, L., Vargas, G., Chávez, F.P.,  
1019 Velazco, F., Ferreira, V., Tapia, P., Salvatteci, R., Boucher, H., Morales, M.C., Valdés,  
1020 J., Reyss, J.-L., Campusano, A., Boussafir, M., Mandeng-Yogo, M., García, M.,  
1021 Baumgartner, T.: Rapid reorganization in ocean biogeochemistry off Peru towards the  
1022 end of the Little Ice Age, *Biogeosciences*, 6, 835–848, 2009.

1023

1024 Hansen, H. P., Koroleff, F.: Determination of nutrients. In *Methods of Seawater*  
1025 *Analysis*. Grasshoff, K., Kremling, K. and Ehrhardt, M. (Eds.), Wiley-VCH Verlag  
1026 GmbH, Weinheim, Germany, 159–228, 1999.

1027

1028 Hatfield, R. G., Stoner, J. S.: Magnetic Proxies and Susceptibility. In: *The Encyclopedia*  
1029 *of Quaternary Science*. Elias, S.A. (ed.) 2, 884-898, 2013.

1030

1031 Hebbeln, D., Marchant, M., Freudenthal, T., Wefer, G.: Surface distribution along  
1032 the Chilean continental slope related to upwelling and productivity. *Marine*  
1033 *Geology* 164, 119–137, 2000.

1034

1035 Hebbeln, D., Marchant, M. and Wefer, G.: Paleoproductivity in the southern Peru ^  
1036 Chile Current through the last 33 000 yr, *Mar. Geol.*, 186, 2002.  
1037

1038 Helly, J. and Levin. L.: Global distribution of naturally occurring marine hypoxia on  
1039 continental margin, *Deep-Sea Res. Pt. I*, 51, 1159-1168, 2004.  
1040

1041 Heusser, C. J. and Moar, N. T.: Pollen and spores of chile: Modern types of the  
1042 pteridophyta, gymnospermae, and angiospermae, *New Zeal. J. Bot.*, 11(2), 389–391,  
1043 doi:10.1080/0028825X.1973.10430287, 1973.

1044 Higginson, M.J.; Altabet, M.A., Wincze, L., Herbert, D., Murray, D.: A solar  
1045 (irradiance) trigger for millennial-scale abrupt changes in the southwest monsoon?  
1046 *Paleoceanography*, 19, PA3015, doi:10.1029/2004PA001031, 2004.  
1047

1048 Huerta-Diaz, M. A. and Morse, J. W.: Pyritization of trace metals in anoxic marine  
1049 sediments, *Geochim. Cosmochim. Acta*, 56(7), 2681–2702, doi:10.1016/0016-  
1050 7037(92)90353-K, 1992.  
1051

1052 Jöris, O. and Weninger, B.: Extension of the C-14 calibration curve to ca. 40,000 cal BC  
1053 by synchronizing Greenland O-18/O-16 ice core records and North Atlantic  
1054 foraminifera profiles: A comparison with U/Th coral data, *Radiocarbon*, 40(1), 495–  
1055 504, doi:10.2458/azu\_js\_rc.40.2036, 1998.  
1056

1057 Kaiser, J., Schefuß, E., Lamy, F., Mohtadi, M., Hebbeln, D.: Glacial to Holocene  
1058 changes in sea surface temperature and coastal vegetation in north central Chile: high  
1059 versus low latitude forcing, *Quat. Sci. Rev.*, 27, 2064–2075, 2008.  
1060

1061 Keshav, N. and Achyuthan, H.: Late Holocene continental shelf sediments, off  
1062 Cuddalore, East coast, Bay of Bengal, India: Geochemical implications for source-area  
1063 weathering and provenance, *Quat. Int.*, 371, 209–218, doi:10.1016/j.quaint.2015.03.002,  
1064 2015.  
1065

1066 Klinkhammer, G. P. and Palmer, M. R. Uranium in the oceans: Where it goes and why,  
1067 *Geochim. Cosmochim. Ac.*, 55(7), 1799–1806, doi: 10.1016/0016-037(91)90024-Y,  
1068 1991.



1069  
1070 Koutavas, A., deMenocal, P.B., Olive, G.C., Lynch-Stieglitz, J.: Mid-Holocene El  
1071 Niño–Southern Oscillation (ENSO) attenuation revealed by individual foraminifera in  
1072 eastern tropical Pacific sediments, 34(12), 993–996, doi: 10.1130/G22810A, 2006.  
1073  
1074 Lamy F., Hebbeln, D., Wefer, G.: High-Resolution Marine Record of Climatic Change  
1075 in Mid-latitude Chile during the Last 28,000 Years Based on Terrigenous Sediment  
1076 Parameters, *Quat. Res.*, 51, 83–93, 1999.  
1077  
1078 Lamy, F., Hebbeln, D., Röhl, U. and Wefer, G.: Holocene rainfall variability in southern  
1079 Chile: a marine record of latitudinal shifts of the Southern Westerlies. *Earth Planet. Sc.*  
1080 *Lett.*, 185, 369–382, 2001.  
1081  
1082 Lamy, F., Rühlemann, C., Hebbeln, D. and Wefer, G.: High- and low-latitude climate  
1083 control on the position of the southern Peru-Chile Current during the Holocene,  
1084 *Paleoceanography*, 17(2), 16-1-16–10, doi:10.1029/2001PA000727, 2002.  
1085  
1086 Lamy, F., Kilian, R., Arz, H.W., Francois J-P., Kaiser, J., Prange, M. and Steinke, T.:  
1087 Holocene changes in the position and intensity of the southern westerly wind belt, *Nat.*  
1088 *Geosci.*, 3, 695–699, 2010.  
1089  
1090 Little, S. H., Vance, D., Walker-Brown, C. and Landing, W. M.: The oceanic mass  
1091 balance of copper and zinc isotopes, investigated by analysis of their inputs, and outputs  
1092 to ferromanganese oxide sediments, *Geochim. Cosmochim. Acta*, 125, 673–693,  
1093 doi:10.1016/j.gca.2013.07.046, 2014.  
1094  
1095 Maldonado, A. and Rozas, E.: Clima y Paleoambientes durante el Cuaternario Tardío en  
1096 la Región de Atacama, in *Libro Rojo de la Flora Nativa y de los Sitios Prioritarios para*  
1097 *su Conservación: Región de Atacama*, pp. 293–304., 2008.  
1098  
1099 Maldonado, A. and Villagrán, C.: Climate variability over the last 9900 cal yr BP from  
1100 a swamp forest pollen record along the semiarid coast of Chile, *Quat. Res.*, 66(2), 246–  
1101 258, doi:10.1016/j.yqres.2006.04.003, 2006.  
1102

1103 Marchant, M., Hebbeln, D. and Wefer, G.: High resolution foraminiferal record of the  
1104 last 13,300 years from the upwelling area off Chile, *Mar. Geol.*, 161, 115–128,  
1105 doi:[https://doi.org/10.1016/S0025-3227\(99\)00041-9](https://doi.org/10.1016/S0025-3227(99)00041-9), 1999.  
1106

1107 Marín, V. H., Delgado, L. E. and Luna-Jorquera, G.: S-chlorophyll squirts at 30°S off  
1108 the Chilean coast (eastern South Pacific): Feature-tracking analysis. *J. Geophys. Res.*,  
1109 108(12), 3378 – 3384, doi:10.1029/2003JC001935, 2003.  
1110

1111 Mazzullo, J., Gilbert, A., Rabinowitz, P., Meyer, A. and Garrison, L.: *Handbook for*  
1112 *Shipboard Sedimentologists*, 67 pp., 1988.  
1113

1114 McManus, J., Nägler, T. F., Siebert, C., Wheat, C. G. and Hammond, D. E.: Oceanic  
1115 molybdenum isotope fractionation: Diagenesis and hydrothermal ridge-flank alteration.  
1116 *Geochem. Geophys. Geosy.*, 3(12), 1–9, 2002.  
1117

1118 Mohtadi, M., Rossel, P., Lange, C.B., Pantoja, S., Böning, P., Repeta, D., Grunwald,  
1119 M., Lamy, F., Hebbeln, D., Brumsack, H-J.: Deglacial pattern of circulation and marine  
1120 productivity in the upwelling region off central-south Chile, *Earth Planet. Sci. Lett.* ,  
1121 272, 221–230, 2008.  
1122

1123 Montecinos, A., and Aceituno, P.: Seasonality of the ENSO-Related Rainfall Variability  
1124 in Central Chile and Associated Circulation Anomalies. *J. Climate.*, 16, 281–296.  
1125 [https://doi.org/10.1175/1520-0442\(2003\)016<0281:SOTERR>2.0.CO;2](https://doi.org/10.1175/1520-0442(2003)016<0281:SOTERR>2.0.CO;2), 2003.  
1126

1127 Montecinos, S., Gutiérrez, J. R., López-Cortés, F. and López, D.: Climatic  
1128 characteristics of the semi-arid Coquimbo Region in Chile, *J. Arid Environ.*, 126, 7–11,  
1129 doi:10.1016/j.jaridenv.2015.09.018, 2015.  
1130

1131 Moraga-Opazo, J., Valle-Levinson, A., Ramos, M. and Pizarro-Koch, M.: Upwelling-  
1132 Triggered near-geostrophic recirculation in an equatorward facing embayment, *Cont.*  
1133 *Shelf Res.*, 31, 1991–1999, 2011.  
1134

1135 Mortlock, R. A. and Froelich, P. N.: A simple method for the rapid determination of  
1136 biogenic opal in pelagic marine sediments, *Deep Sea Res. Part A, Oceanogr. Res. Pap.*,  
1137 36(9), 1415–1426, doi:10.1016/0198-0149(89)90092-7, 1989.  
1138

1139 Mosley-Thompson, E., Thompson, L. G. and Lin, P. N.: A multi-century ice-core  
1140 perspective on 20th-century climate change with new contributions from high-Arctic  
1141 and Greenland (PARCA) cores, *Ann. Glaciol.*, 43, 42–48,  
1142 doi:10.3189/172756406781812401, 2006.  
1143

1144 Morse, J.W. and Luther, G.W.: Chemical influences on trace metal–sulfide interactions  
1145 in anoxic sediments. *Geochim Cosmochim Ac.*, 63, 3373–3378, 1999.  
1146

1147 Moy, C.M., Seltzer, G.O., Rodbell, D.T. and Anderson, D.M.: Variability of El  
1148 Niño/Southern Oscillation activity at millennial timescales during the Holocene epoch.  
1149 *Nature*, 420(6912), p.162, 2002.  
1150

1151 Muñoz, P., Dezileau, L., Dezileau, L., Lange, C.B., Cardenas, L., Sellanes, J.,  
1152 Salamanca, M.A., Maldonado, A.: Evaluation of sediment trace metal records as  
1153 paleoproductivity and paleoxygenation proxies in the upwelling center off Concepción,  
1154 Chile (36°S)., *Prog. Oceanogr.*, 92–95, 66–80, 2012.  
1155

1156 Nakanishi, T. and Minagawa, M.: Stable carbon and nitrogen isotopic compositions of  
1157 sinking particles in the northeast Japan Sea, *Geochem. J.*, 37(2), 261–275,  
1158 doi:<https://doi.org/10.2343/geochemj.37.261>, 2003.  
1159

1160 Nameroff, T., Balistrieri, L. and Murray, W.: Suboxic trace metals geochemistry in the  
1161 eastern tropical North Pacific, *Geochim Cosmochim Ac.*, 66(7), 1139–1158, 2002.  
1162

1163 Nurhati, I. S., Cobb, K. M., Charles, C. D. and Dunbar, R. B.: Late 20th century  
1164 warming and freshening in the central tropical Pacific, *Geophys. Res. Lett.*, 36(21), 2–5,  
1165 doi:10.1029/2009GL040270, 2009.  
1166

1167 Ogrinc, N., Fontolan, G., Faganeli, J. and Covelli, S.: Carbon and nitrogen isotope  
1168 compositions of organic matter in coastal marine sediments (the Gulf of Trieste, N  
1169 Adriatic Sea): indicators of sources and preservation, *Mar. Chem.*, 95, 163-181, 2005.  
1170

1171 Ohnemus, D. C. and Lam, P. J.: Cycling of lithogenic marine particles in the US  
1172 GEOTRACES North Atlantic transect, *Deep. Res. Part II Top. Stud. Oceanogr.*, 116,  
1173 283–302, doi:10.1016/j.dsr2.2014.11.019, 2015.  
1174

1175 Paytan, A.: Ocean paleoproductivity, *Encyclopedia of Paleoclimatology and Ancient*  
1176 *Environments*, Encyclopedia of Earth Science Series, Gornitz, V. (Ed.), Kluwer  
1177 Academic Publishers. 2008.  
1178

1179 Peacock, C.L. and Sherman, D.M.: Copper(II) sorption onto goethite, hematite and  
1180 lepidocrocite: a surface complexation model based on ab initio molecular geometries  
1181 and EXAFS spectroscopy. *Geochim. Cosmochim. Ac.*, 68, 2623–2637, 2004.  
1182

1183 Pizarro, O., Shaffer, G., Dewitte, B. and Ramos, M.: Dynamics of seasonal and  
1184 interannual variability of the Peru-Chile Undercurrent, *Geophys. Res. Lett.*, 29(12), 28–  
1185 31, doi:10.1029/2002GL014790, 2002.  
1186

1187 Ramos, M., Pizarro, O., Bravo, L. and Dewitte, B.: Seasonal variability of the permanent  
1188 thermocline off northern Chile, *Geophys. Res. Lett.*, 33, L09608,  
1189 doi:10.1029/2006GL025882, 2006.  
1190

1191 Ramos, M., Dewitte, B., Pizarro, O. and Garric, G.: Vertical propagation of  
1192 extratropical Rossby waves during the 1997–1998 El Niño off the west coast of South  
1193 America in a medium-resolution OGCM simulation, *J. Geophys. Res.*, 113, C08041,  
1194 doi:10.1029/2007JC004681, 2008.  
1195

1196 Rau, H. G., Takahashi, T. and Des Marais, D. J.: Latitudinal variations in plankton  
1197  $\delta^{13}\text{C}$ : implications for  $\text{CO}_2$  and productivity in past oceans, *Nature*, 341, 516–518,  
1198 1989.  
1199

1200 Reimer, P. J., Bard, E., Bayliss, A., Beck, J. W., Blackwell, P. G., Ramsey, C. B., Buck,  
1201 C. E., Cheng, H., Edwards, R. L., Friedrich, M., Grootes, P. M., Guilderson, T. P.,  
1202 Hafliðason, H., Hajdas, I., Hatté, C., Heaton, T. J., Hoffmann, D. L., Hogg, A. G.,  
1203 Hughen, K. A., Kaiser, K. F., Kromer, B., Manning, S. W., Niu, M., Reimer, R. W.,  
1204 Richards, D. A., Scott, E. M., Southon, J. R., Staff, R. A., Turney, C. S. M. and van der  
1205 Plicht, J.: IntCal13 and Marine13 Radiocarbon Age Calibration Curves 0–50,000 Years  
1206 cal BP, *Radiocarbon*, 55(4), 1869–1887, doi:10.2458/azu\_js\_rc.55.16947, 2013.  
1207  
1208 Rein, B., Lückge, A., Sirocko, F.: A major Holocene ENSO anomaly during Medieval  
1209 period, *Geophys. Res. Lett.* 31, L17211, doi:10.1029/2004GL020, 2004  
1210  
1211 Rivera, P.: Beiträge zur Taxonomie und Verbreitung der Gattung *Thalassiosira* Cleve.  
1212 *Bibl. Phycol.*, 56, 1–220, 1981.  
1213  
1214 Rodbell, D.T., Seltzer, G.O., Anderson, D.M., Abbott, M.B, Enfield, D.B, Newman JH:  
1215 An approximately 15,000-year record of El Niño-driven alluviation in southwestern  
1216 Ecuador, *Science*, 283, 516 – 520, 1999.  
1217  
1218 Round, E. E., Crawford, R. M. and Mann, D.G.: *The Diatoms: biology and morphology*  
1219 *of the genera*. Cambridge University Press, Cambridge, 747 pp., 1990.  
1220  
1221 Romero, O., Kim, J-H, Hebbeln, D.: Paleoproductivity evolution off central Chile from  
1222 the Last Glacial Maximum to the Early Holocene, *Quat. Res.*, 65, 519 – 525, 2006.  
1223  
1224 Saavedra - Pellitero, M., Flores, J. A., Lamy, F., Sierro, F. J., Cortina, A. A.:  
1225 Coccolithophore estimates of paleotemperature and paleoproductivity changes in the  
1226 southeast Pacific over the past ~27 kyr.  
1227  
1228 Sabatier, P., Dezileau, L., Blanchemanche, P., Siani, G., Condomines, M., Bentaleb, I.  
1229 and Piquès, G.: Holocene variations of radiocarbon reservoir ages in a mediterranean  
1230 lagoonal system, *Radiocarbon*, 52(1), 91–102, doi:10.1017/S0033822200045057, 2010.  
1231  
1232 Saito, C., Noriki, S. and Tsunogai, S.: Particulate flux of  $A_i$ , a component of land  
1233 origin, in the western North Pacific, *Deep-Sea Res.*, 39, 1315–1327, 1992.

1234  
1235 Salvattecí, R., Gutiérrez, D., Field, D., Sifeddine, A., Ortlieb, L., Bouloubassi, I.,  
1236 Boussafir, M., Boucher, H. and Cetin, F.: The response of the Peruvian Upwelling  
1237 Ecosystem to centennial-scale global change during the last two millennia, *Clim. Past*,  
1238 10(2), 715–731, doi:10.5194/cp-10-715-2014, 2014.  
1239  
1240 Sarmiento, J. L. and Gruber, N.: Sinks for Anthropogenic Carbon, *Phys. Today*, 55(8),  
1241 30–36, doi:10.1063/1.1510279, 2002.  
1242  
1243 Schneider, D. P. and Steig, E. J.: Ice cores record significant 1940s Antarctic warmth  
1244 related to tropical climate variability, *Proc. Natl. Acad. Sci.*, 105(34), 12154–12158,  
1245 doi:10.1073/pnas.0803627105, 2008.  
1246  
1247 Schrader H. J. and Gersonde, R.: Diatoms and silicoflagellates. *Utrecht Micropaleontol.*  
1248 *Bull.* 17, 129–176, 1978.  
1249  
1250 Sellanes, J. , Quiroga, E., Neira, C., Gutiérrez, D., : Changes of macrobenthos  
1251 composition under different ENSO cycle conditions on the continental shelf off central  
1252 Chile, *Cont. Shelf. Res.* 27, 1002 –1016, 2007.  
1253  
1254 Shaffer, G., Pizarro, O. Djurfeldt, L., Salinas, S. and Rutllant, J.: Circulation and low-  
1255 frequency variability near the Chilean coast: Remotely forced fluctuations during the  
1256 1991– 92 El Niño, *J. Phys. Oceanogr.*, 27, 217– 235, 1997.  
1257  
1258 Siebert, C., Nägler, T. F., von Blanckenburg, F., and Kramers, J. D.: Molybdenum  
1259 isotope records as a potential new proxy for paleoceanography, *Earth Planet. Sc. Lett.*,  
1260 211(1), 159–171, 2003.  
1261  
1262 Sigman, D.M., Karsh, K.L., Casciotti, K.L.: Ocean process tracers: nitrogen isotopes in  
1263 the ocean. *Encyclopedia of ocean science*, 2nd edn Elsevier, Amsterdam.  
1264 Sims, P.A. 1996. *An Atlas of British Diatoms*. Biopress Ltd, Bristol United Kingdom  
1265 601, 2009.  
1266

1267 Sun, X., Higgins, J. and Turchyn, A. V.: Diffusive cation fluxes in deep-sea sediments  
1268 and insight into the global geochemical cycles of calcium, magnesium, sodium and  
1269 potassium, *Mar. Geol.*, 373, 64–77, doi:10.1016/j.margeo.2015.12.011, 2016.  
1270

1271 Sundby, B., Martinez, P. and Gobeil, C.: Comparative geochemistry of cadmium,  
1272 rhenium, uranium, and molybdenum in continental margin sediments, *Geochim.*  
1273 *Cosmochim. Ac.*, 68, 2485–2493, 2004.  
1274

1275 Sweeney, R. E., Kaplan I. R.: Natural abundances of  $^{15}\text{N}$  as a source indicator of  
1276 nearshore marine sedimentary and dissolved nitrogen, *Mar. Chem.*, 9, 81–94, 1980.  
1277

1278 Thomas, C. D., Bodsworth, E. J., Wilson, R. J., Simmons, A. D., Davies, Z. G.,  
1279 Musche, M. and Conradt, L.: Ecological and evolutionary processes at expanding range  
1280 margins, *Nature*, 411, 577–581, 2001.  
1281

1282 Torres, M. E., Brumsack, H. J., Bohrman, G. and Emeis, K. C.: Barite front in  
1283 continental margin sediments: a new look at barium remobilization in the zone of  
1284 sulfate reduction and formation of heavy barites in diagenetic fronts, *Chem. Geol.*, 127,  
1285 125–139, 1996.  
1286

1287 Torres, R., and Ampuero, P.: Strong  $\text{CO}_2$  outgassing from high nutrient low chlorophyll  
1288 coastal waters off central Chile ( $30^\circ\text{S}$ ): The role of dissolved iron, *Estuar. Coast. Shelf*  
1289 *S.*, 83, 126–132, doi:10.1016/j.ecss.2009.02.030, 2009.  
1290

1291 Tribovillard, N., Algeo, T. J., Lyons, T. and Riboulleau, A.: Trace metals as paleoredox  
1292 and paleoproductivity proxies: an update. *Chem. Geol.*, 232, 12–32, 2006.  
1293

1294 Vance, D., Archer, C., Bermin, J., Perkins, J., Statham, P. J., Lohan, M. C., Ellwood, M.  
1295 J. and Mills, R. A.: The copper isotope geochemistry of rivers and the oceans, *Earth*  
1296 *Planet. Sc. Lett.*, 274, 204–213, 2008.  
1297

1298 Valle-Levinson, A., Moraga, J., Olivares, J. and Blanco, J. L.: Tidal and residual  
1299 circulation in a semi-arid bay: Coquimbo Bay, Chile. *Cont. Shelf Res.*, 20, 2009–2018,  
1300 2000.

1301  
1302 Valle-Levinson, A. and Moraga-Opazo, J.: Observations of bipolar residual circulation  
1303 in two equatorward-facing semiarid bays, *Cont. Shelf Res.*, 26(2), 179–193,  
1304 doi:10.1016/j.csr.2005.10.002, 2006.  
1305  
1306 Van der Weijden, C.: Pitfalls of normalization of marine geochemical data  
1307 using a common divisor, *Mar. Geol.*, 184, 167–187, 2002.  
1308  
1309 Vargas, G., Ortlieb, L., Pichon, J. J., Bertaux, J. and Pujos, M.: Sedimentary facies and  
1310 high resolution primary production inferences from laminated diatomaceous sediments  
1311 off northern Chile (23°S), *Mar. Geol.*, 211(1–2), 79–99,  
1312 doi:10.1016/j.margeo.2004.05.032, 2004.  
1313  
1314 Vargas, G., Rutllant, J., Ortlieb, L.: ENSO tropical–extratropical climate  
1315 teleconnections and mechanisms for Holocene debris flows along the hyperarid coast of  
1316 western South America (17°–24°S), *Earth Planet. Sci. Lett.*, 249, 467–483, 2006.  
1317  
1318 Vargas, G., Pantoja, S., Rutllant, J., Lange, C. and Ortlieb, L.: Enhancement of coastal  
1319 upwelling and interdecadal ENSO-like variability in the Peru-Chile Current since late  
1320 19th century. *Geophys. Res. Lett.*, 34, L13607, 2007.  
1321  
1322 Varma, V., Prange, M., Merkel, U., Kleinen, T., Lohmann, G., Pfeiffer, M., Renssen,  
1323 H., Wagner, A. and Schulz, M.: Holocene evolution of the Southern Hemisphere  
1324 westerly winds in transient simulations with global climate models. *Clim. Past*, 8, 391–  
1325 402, doi:10.5194/cp-8-391-2012, 2012.  
1326  
1327 Veit, H.: Southern Westerlies during the Holocene deduced from geomorphological and  
1328 pedological studies in the Norte Chico, Northern Chile (27–33°S). *Palaeogeogr.*,  
1329 *Palaeoclimatol.*, *Palaeoecol.*, 123, 107–119, 1996.  
1330  
1331 Wells, D. V., Hill, J. M., Park, M. J. and Williams, C. P.: The Shallow Sediments of the  
1332 Middle Chincoteague Bay Area in Maryland: Physical and Chemical Characteristics.  
1333 (Coastal and Estuarine Geology File Report No. 98-1): Maryland Geological Survey,  
1334 Baltimore, MD., 104 pp., 1998.



1335

1336 Williams, P. M. and Gordon, L. I.: Carbon-13:carbon-12 ratios in dissolved and  
1337 particulate organic matter in the sea. *Deep-Sea Res.*, 17, 19–27, 1970.

1338

1339 Xu, G., Liu, J., Pei, S., Kong, X., Hu, G. and Gao, M.: Source identification of  
1340 aluminum in surface sediments of the Yellow Sea off the Shandong Peninsula, *Acta*  
1341 *Oceanol. Sin.*, 34(12), 147–153, doi:10.1007/s13131-015-0766-9, 2015.

1342

1343 Zheng, Y., van Geen, A., Anderson, R. F., Gardner, J. V. and Dean, W. E.:  
1344 Intensification of the northeast Pacific oxygen minimum zone during the Bölling-  
1345 Alleröd warm period, *Paleoceanography*, 15, 528–536, 2000.

1346

1347 Zheng, Y., Anderson, R. F., van Geen, A. and Fleisheir, M.Q.: Preservation of non-  
1348 lithogenic particulate uranium in marine sediments. *Geochim. Cosmochim. Ac.*, 66,  
1349 3085–3092, 2002.

1350

### 1351 **Acknowledgments**

1352 We would like to thank the R/V Stella Maris II crew of Universidad Católica del Norte  
1353 for their help and support during field work. We extend our acknowledgements to the  
1354 laboratory assistants of the Paleoceanography Lab at Universidad de Concepción, for  
1355 their aid in sample analyses. We also wish to thank Dr. Olivier Bruguier of CNRS and  
1356 his lab personnel for their assistance during ICPMs analyses. We also express our  
1357 gratitude to INNOVA 07CN13 IXM-150. This manuscript was funded by FONDECYT  
1358 Project No. 1140851. Partial support from the COPAS Sur-Austral (CONICYT PIA  
1359 PFB31) and FONDAP-IDEAL centers (No. 15150003) is also acknowledged.

1360

## Tables

Table 1. Concentration of elements in Pachingo wetland sediments, considered as lithogenic background for the study area. The values correspond to mean concentrations in surface sediments (0–3 cm).

| <b>Element</b> | <b>Metal/Al x 10<sup>3</sup></b> | <b>s</b> |
|----------------|----------------------------------|----------|
| Ca             | 686.5                            | 139.3    |
| Fe             | 591.3                            | 84.5     |
| P              | 8.6                              | 0.7      |
| Sr             | 5.7                              | 0.6      |
| Ba             | 5.6                              | 0.1      |
| Cu             | 0.258                            | 0.019    |
| Ni             | 0.174                            | 0.005    |
| U              | 0.020                            | 0.003    |
| Mo             | 0.020                            | 0.003    |
| Cd             | 0.0021                           | 0.0003   |
| Re             | 0.00004                          | 0.00001  |

Table 2. Radiocarbon dates for BGGC5 and BTGC8 sediment cores collected from mixed planktonic foraminifera and monospecific benthic foraminifera (*Bolivina plicata*), respectively. The  $^{14}\text{C}$ -AMS was performed at NOSAM-WHOI. The lab code and conventional ages collected from each core section is indicated. For error calculations see <http://www.whoi.edu/nosams/radiocarbon-data-calculations>.

| Core identification     | material                | mass (mg) | Lab Code NOSAM | Modern fraction pMC | 1 $\sigma$ error | Conventional Age BP | 1 $\sigma$ error |
|-------------------------|-------------------------|-----------|----------------|---------------------|------------------|---------------------|------------------|
| Planktonic foraminifera |                         |           |                |                     |                  |                     |                  |
| BGGC5                   |                         |           |                |                     |                  |                     |                  |
| 10-11                   | mix                     | 1,8       | OS-122160      | 0,8895              | 0,0027           | 940                 | 25               |
| 18-19                   | mix                     | 1,1       | OS-122141      | 0,7217              | 0,0024           | 2.620               | 25               |
| 31-32                   | mix                     | 2,7       | OS-122161      | 0,6590              | 0,0021           | 3.350               | 25               |
| 45-46                   | mix                     | 2         | OS-122162      | 0,6102              | 0,0017           | 3.970               | 25               |
| 55-56                   | mix                     | 1,6       | OS-122138      | 0,5864              | 0,0025           | 4.290               | 35               |
| 66-67                   | mix                     | 2,8       | OS-122304      | 0,5597              | 0,0018           | 4.660               | 25               |
| 76-77                   | mix                     | 2,6       | OS-122163      | 0,4520              | 0,0016           | 6.380               | 30               |
| 96-97                   | mix                     | 1,1       | OS-122139      | 0,4333              | 0,0033           | 6.720               | 60               |
| 115-116                 | mix                     | 4,7       | OS-122164      | 0,3843              | 0,0016           | 7.680               | 35               |
| Benthic foraminifera    |                         |           |                |                     |                  |                     |                  |
| BTGC8                   |                         |           |                |                     |                  |                     |                  |
| 5-6                     | <i>Bolivina plicata</i> | 4,2       | OS-130657      | 0,8953              | 0,0017           | 890                 | 15               |
| 20-21                   | <i>Bolivina plicata</i> | 7,7       | OS-123670      | 0,7337              | 0,0021           | 2.490               | 25               |
| 30-31                   | <i>Bolivina plicata</i> | 13        | OS-123671      | 0,6771              | 0,0016           | 3.130               | 20               |
| 40-41                   | <i>Bolivina plicata</i> | 11        | OS-123672      | 0,6507              | 0,0019           | 3.450               | 25               |
| 50-51                   | <i>Bolivina plicata</i> | 8,7       | OS-123673      | 0,5877              | 0,0014           | 4.270               | 20               |
| 60-61                   | <i>Bolivina plicata</i> | 13        | OS-123674      | 0,5560              | 0,0018           | 4.720               | 25               |
| 71-72                   | <i>Bolivina plicata</i> | 10        | OS-123675      | 0,4930              | 0,0013           | 5.680               | 20               |
| 80-81                   | <i>Bolivina plicata</i> | 7,3       | OS-123676      | 0,4542              | 0,0012           | 6.340               | 20               |
| 90-91                   | <i>Bolivina plicata</i> | 6,8       | OS-123677      | 0,4259              | 0,0015           | 6.860               | 30               |
| 96-97                   | <i>Bolivina plicata</i> | 6,8       | OS-123678      | 0,3903              | 0,0013           | 7.560               | 25               |

Table 3. Reservoir age (DR) estimation considering the  $^{210}\text{Pb}$  age determined with the CRS model (McCaffrey and Thomson, 1980) at a selected depth sections of the core, compared with  $^{14}\text{C}$  ages (yr BP) from marine13.14 curve (Reimer et al., 2013), according to Sabatier et al. (2010).

| Core  | cm   | Age from CRS model | Age years BP <sup>a</sup> | $^{14}\text{C}$ marine13 curve | $^{14}\text{C}$ age BP from foram. | DR  | s  |
|-------|------|--------------------|---------------------------|--------------------------------|------------------------------------|-----|----|
| BGGC5 | 10.5 | 1828               | 122                       | 499                            | 940                                | 441 | 15 |
| BTCG8 | 5.5  | 1908               | 42                        | 448                            | 890                                | 442 | 17 |

a. Before present=1950

Table 4. Spearman rank order correlations for geochemical data. Significant values >0.8 are indicated in bold.

| <b>BGGC5</b> |      |       |       |       |             |             |       |             |       |             |             |             |             |       |             |       |
|--------------|------|-------|-------|-------|-------------|-------------|-------|-------------|-------|-------------|-------------|-------------|-------------|-------|-------------|-------|
|              | Al   | P     | K     | Ca    | Mn          | Fe          | Ni    | Cu          | Mo    | Cd          | Re          | Sr          | U           | Ba    | Opal        | TOC   |
| Al           | 1.00 | -0.62 | 0.49  | -0.48 | 0.64        | 0.60        | -0.75 | 0.56        | -0.10 | -0.73       | -0.08       | -0.33       | 0.08        | 0.49  | -0.52       | -0.44 |
| P            |      | 1.00  | -0.31 | 0.37  | -0.45       | -0.56       | 0.56  | -0.57       | 0.01  | 0.61        | -0.11       | 0.39        | -0.12       | -0.20 | 0.49        | 0.24  |
| K            |      |       | 1.00  | -0.24 | <b>0.90</b> | <b>0.83</b> | -0.29 | 0.47        | 0.28  | -0.42       | 0.33        | -0.12       | 0.50        | 0.26  | -0.25       | -0.19 |
| Ca           |      |       |       | 1.00  | -0.47       | -0.50       | 0.44  | -0.64       | 0.23  | 0.59        | 0.39        | <b>0.92</b> | 0.30        | -0.60 | 0.18        | 0.32  |
| Mn           |      |       |       |       | 1.00        | <b>0.94</b> | -0.51 | 0.68        | -0.01 | -0.68       | 0.07        | -0.32       | 0.24        | 0.43  | -0.39       | -0.31 |
| Fe           |      |       |       |       |             | 1.00        | -0.49 | <b>0.81</b> | 0.03  | -0.70       | 0.11        | -0.40       | 0.23        | 0.36  | -0.37       | -0.21 |
| Ni           |      |       |       |       |             |             | 1.00  | -0.51       | 0.49  | <b>0.91</b> | 0.35        | 0.25        | 0.26        | -0.70 | 0.72        | 0.64  |
| Cu           |      |       |       |       |             |             |       | 1.00        | -0.12 | -0.71       | -0.06       | -0.61       | 0.00        | 0.31  | -0.39       | -0.07 |
| Mo           |      |       |       |       |             |             |       |             | 1.00  | 0.50        | <b>0.88</b> | 0.10        | 0.91        | -0.48 | 0.33        | 0.36  |
| Cd           |      |       |       |       |             |             |       |             |       | 1.00        | 0.36        | 0.42        | 0.27        | -0.67 | 0.70        | 0.54  |
| Re           |      |       |       |       |             |             |       |             |       |             | 1.00        | 0.27        | <b>0.92</b> | -0.50 | 0.16        | 0.38  |
| Sr           |      |       |       |       |             |             |       |             |       |             |             | 1.00        | 0.24        | -0.36 | 0.05        | 0.17  |
| U            |      |       |       |       |             |             |       |             |       |             |             |             | 1.00        | -0.39 | 0.10        | 0.29  |
| Ba           |      |       |       |       |             |             |       |             |       |             |             |             |             | 1.00  | -0.30       | -0.59 |
| Opal         |      |       |       |       |             |             |       |             |       |             |             |             |             |       | 1.00        | 0.35  |
| TOC          |      |       |       |       |             |             |       |             |       |             |             |             |             |       |             | 1.00  |
| <b>BTGC8</b> |      |       |       |       |             |             |       |             |       |             |             |             |             |       |             |       |
|              | Al   | P     | K     | Ca    | Mn          | Fe          | Ni    | Cu          | Mo    | Cd          | Re          | Sr          | U           | Ba    | Opal        | TOC   |
| Al           | 1.00 | -0.19 | -0.17 | -0.37 | -0.02       | -0.03       | -0.39 | -0.04       | -0.39 | 0.02        | -0.13       | -0.58       | -0.19       | 0.07  | -0.41       | -0.29 |
| P            |      | 1.00  | 0.23  | 0.00  | 0.43        | 0.28        | 0.58  | 0.23        | 0.37  | 0.13        | -0.04       | 0.30        | 0.14        | -0.14 | 0.56        | 0.13  |
| K            |      |       | 1.00  | -0.02 | 0.54        | 0.41        | 0.43  | 0.22        | -0.11 | 0.05        | -0.04       | 0.19        | -0.28       | 0.28  | 0.26        | 0.20  |
| Ca           |      |       |       | 1.00  | -0.33       | -0.27       | 0.00  | -0.23       | 0.39  | 0.01        | 0.33        | 0.50        | 0.47        | -0.34 | 0.20        | 0.34  |
| Mn           |      |       |       |       | 1.00        | 0.21        | 0.64  | 0.01        | 0.05  | 0.33        | 0.15        | 0.32        | -0.02       | 0.24  | 0.32        | 0.00  |
| Fe           |      |       |       |       |             | 1.00        | 0.13  | 0.71        | -0.40 | -0.48       | -0.67       | -0.37       | -0.62       | 0.13  | 0.14        | 0.10  |
| Ni           |      |       |       |       |             |             | 1.00  | 0.24        | 0.56  | 0.20        | 0.25        | 0.64        | 0.19        | -0.16 | <b>0.80</b> | 0.45  |
| Cu           |      |       |       |       |             |             |       | 1.00        | -0.25 | -0.68       | -0.56       | -0.22       | -0.61       | -0.10 | 0.21        | 0.37  |
| Mo           |      |       |       |       |             |             |       |             | 1.00  | 0.45        | 0.59        | 0.66        | 0.69        | -0.41 | 0.58        | 0.30  |
| Cd           |      |       |       |       |             |             |       |             |       | 1.00        | 0.56        | 0.39        | 0.52        | 0.11  | 0.10        | -0.12 |
| Re           |      |       |       |       |             |             |       |             |       |             | 1.00        | 0.53        | <b>0.83</b> | -0.16 | 0.13        | 0.17  |
| Sr           |      |       |       |       |             |             |       |             |       |             |             | 1.00        | 0.58        | -0.13 | 0.52        | 0.23  |
| U            |      |       |       |       |             |             |       |             |       |             |             |             | 1.00        | -0.19 | 0.21        | 0.00  |
| Ba           |      |       |       |       |             |             |       |             |       |             |             |             |             | 1.00  | -0.28       | -0.42 |
| Opal         |      |       |       |       |             |             |       |             |       |             |             |             |             |       | 1.00        | 0.39  |
| TOC          |      |       |       |       |             |             |       |             |       |             |             |             |             |       |             | 1.00  |

## Figures

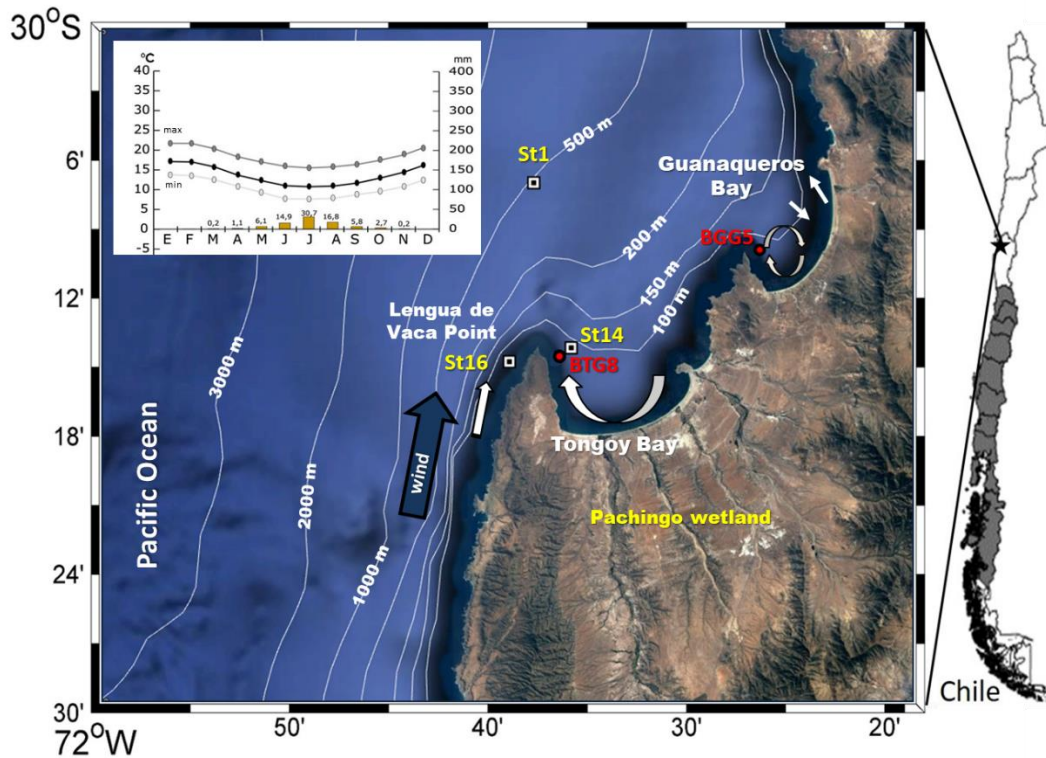

1361 Figure 1. Study area showing the position of sampling stations. Sediment cores were  
1362 retrieved from Guanaqueros Bay (BGGC5) and from Tongoy Bay (BTGC8) at water  
1363 depths of 89 and 85 m, respectively. Information of dissolved oxygen (DO) in the water  
1364 column at ST1 and ST16 and of suspended organic particles collected at ST14 sampling  
1365 sites was gathered in a previous project (INNOVA 07CN13 IXM-150). Climograph of  
1366 the region is showing the average precipitation in mm (bars) and temperatures in °C  
1367 (min, max and average) over 12-month period. Schematic representation of the bays  
1368 circulation (white arrows) and wind direction is indicated (blue arrow) obtained from  
1369 Valle-Levinson and Moraga-Opazo (2006) and Moraga-Opazo et al. (2001).

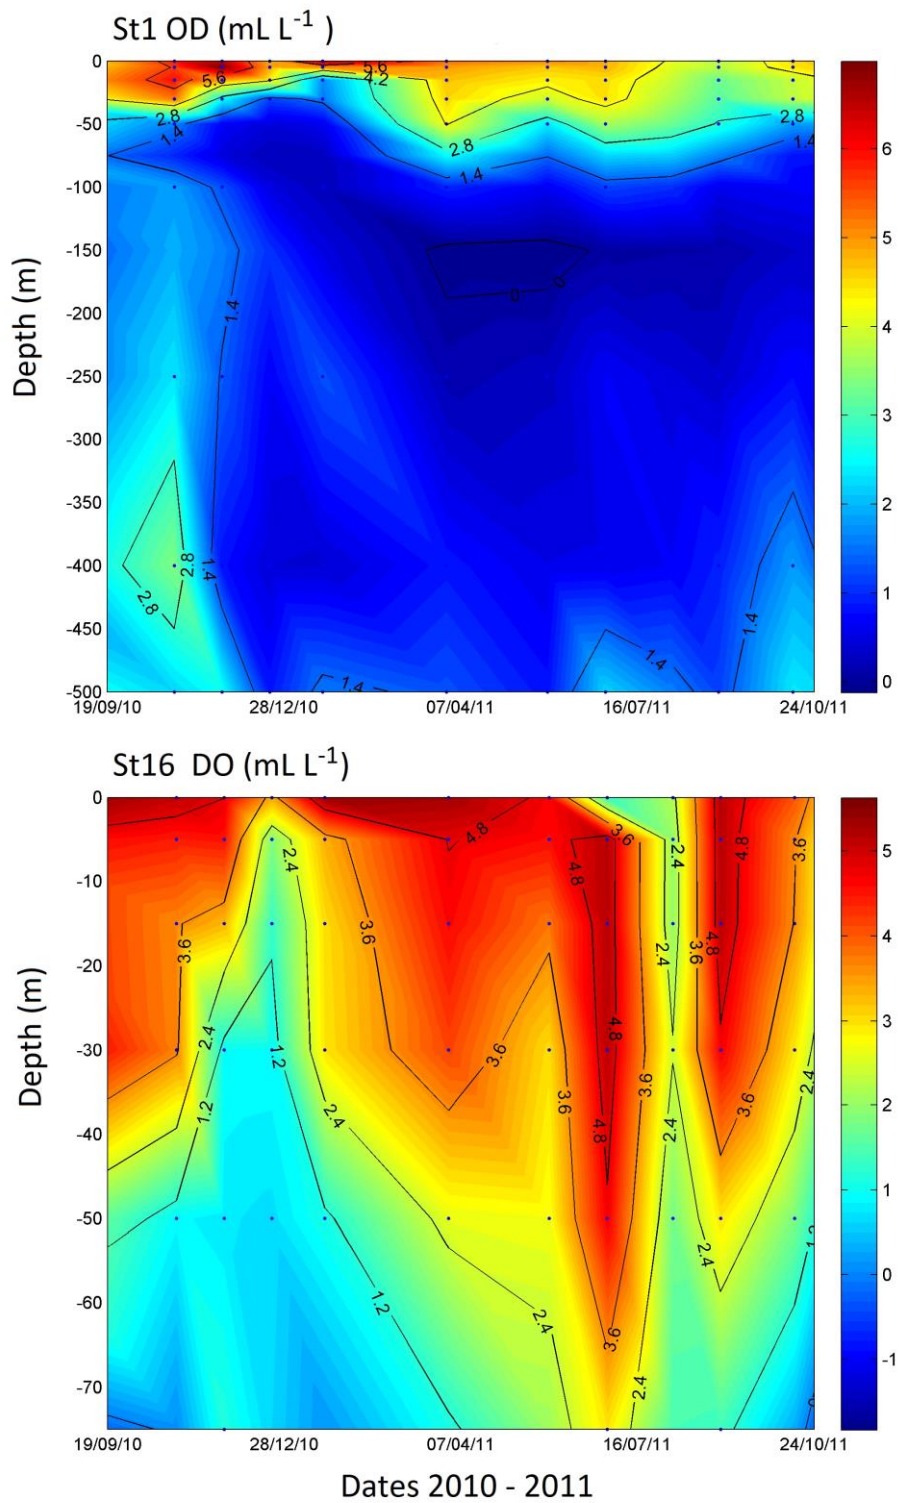

Figure 2. Dissolved Oxygen (DO) time series in the water column measured between October 2010 and January 2011, at stations St1 and St16 off Tongoy Bay, Coquimbo (30°S).

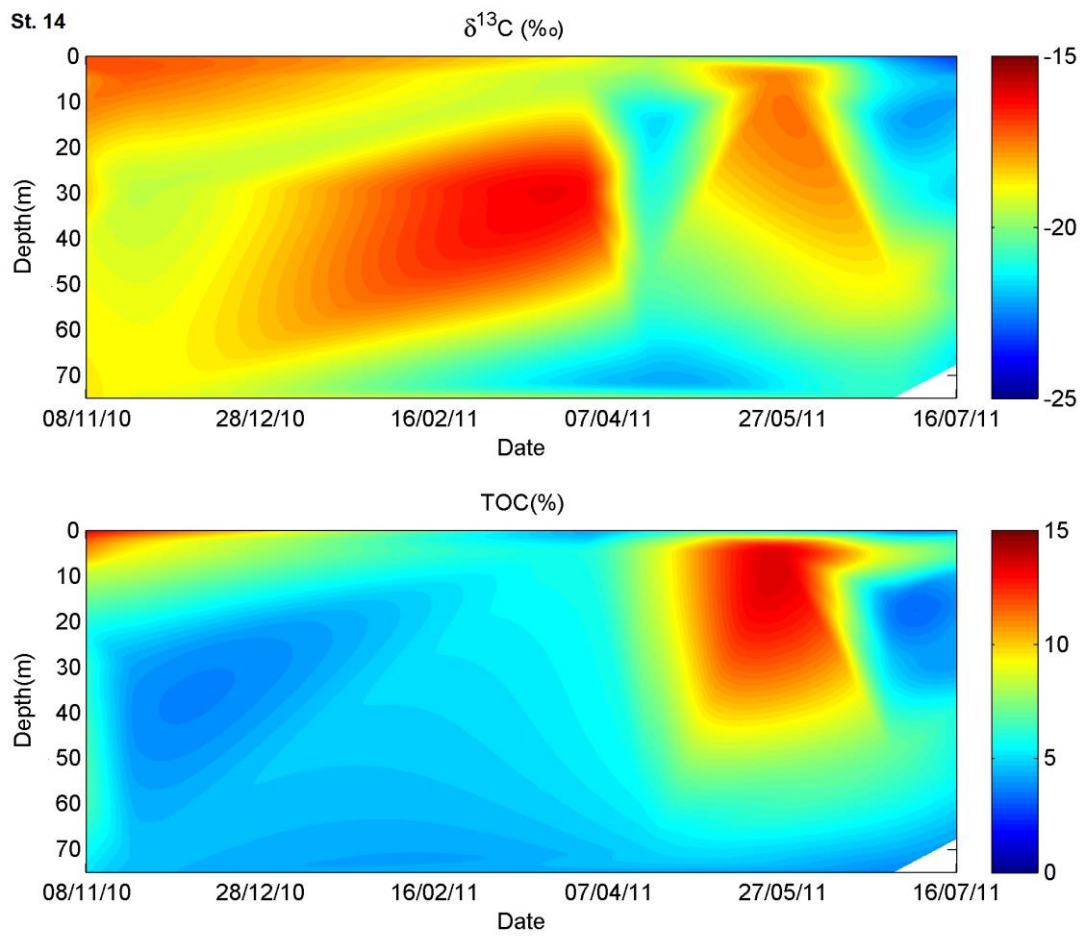

Figure 3. Suspended particulate matter composition (TOC % and  $\delta^{13}\text{C}_{\text{org}}$ ) measured in the water column between October 2010 and October 2011, at station St14, Tongoy Bay, Coquimbo (30°S).



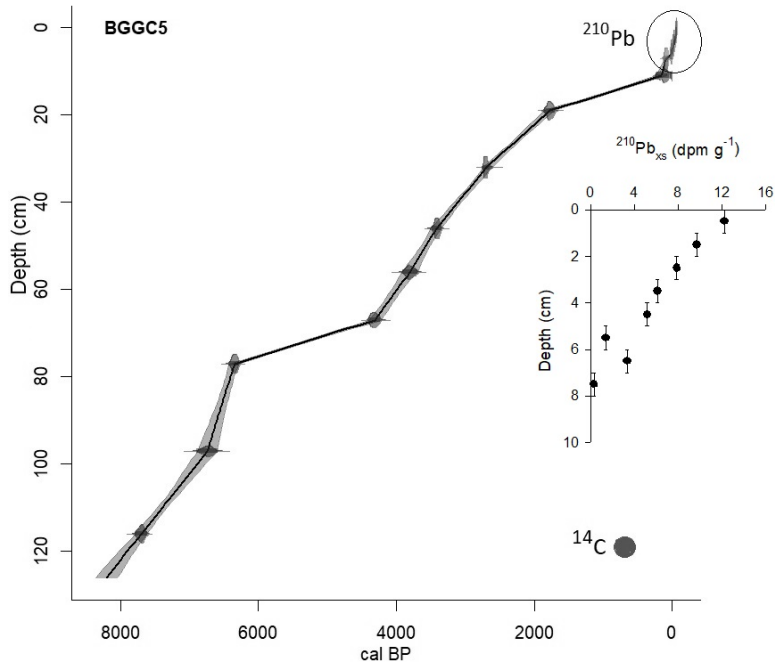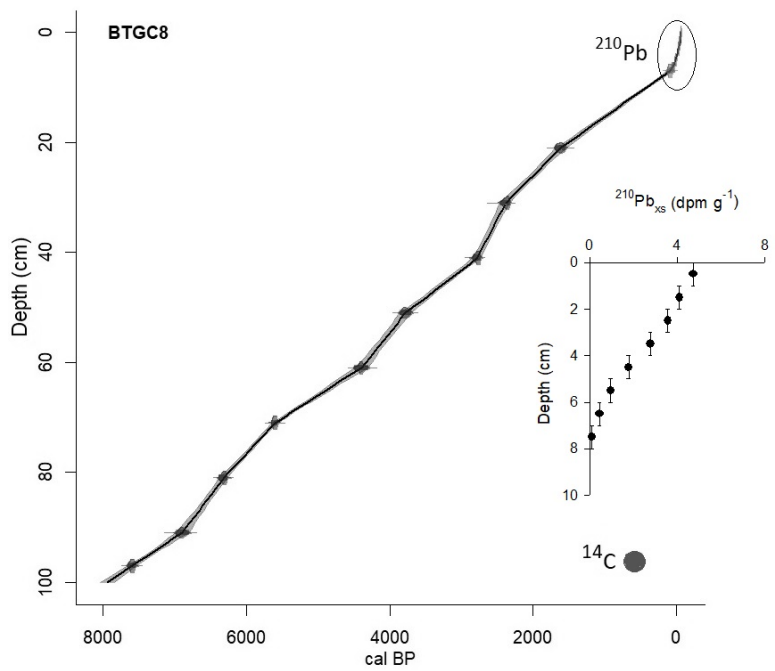

Figure 4. Age model based on  $^{14}\text{C}$ AMS and  $^{210}\text{Pb}$  measurements. The time scale was obtained according to the best fit of curves of  $^{210}\text{Pb}_{\text{xs}}$  and  $^{14}\text{C}$  points using CLAM 2.2 software and Marine curve  $^{13}\text{C}$  (Reimer et al., 2013).

a) BGGC5

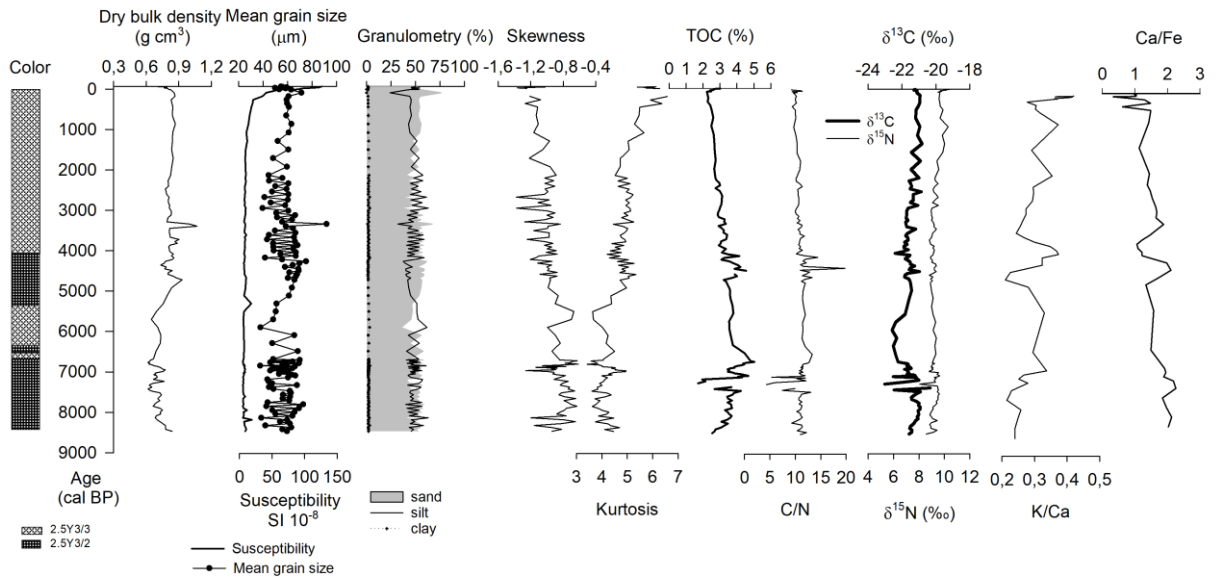

b) BTGC8

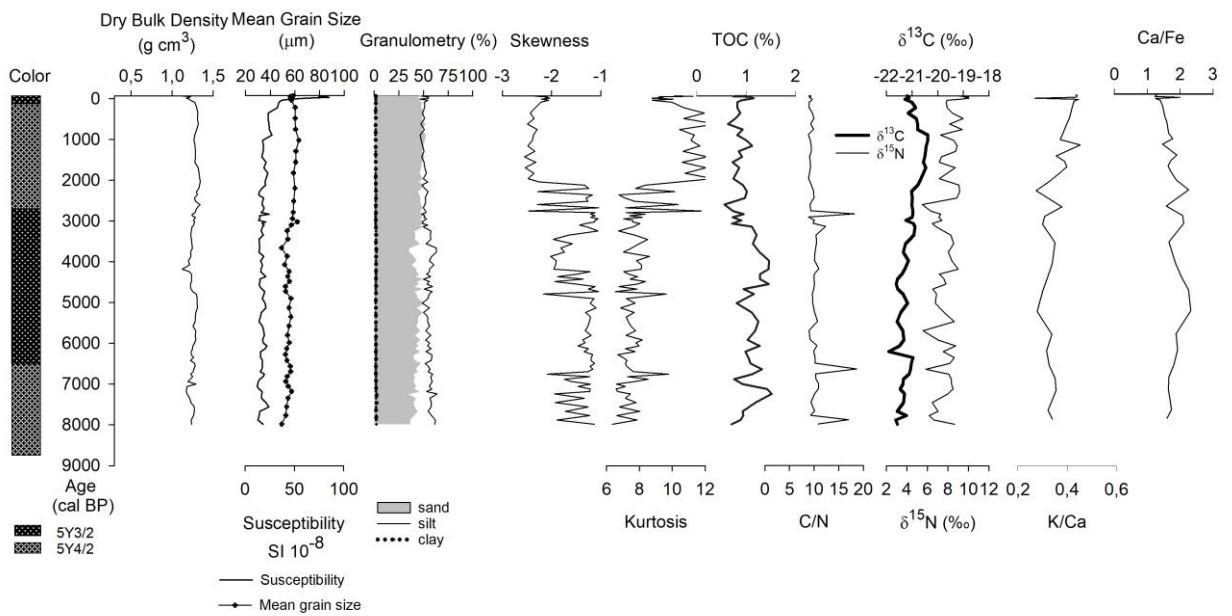

Figure 5. Sediment characterization of sediment cores retrieved from (a) Guanaqueros Bay (BGGC5) and (b) Tongoy Bay (BTGC8). Distribution in depth core of color, dry bulk density, statistical parameters (skewness, mean grain size, kurtosis), organic components (TOC, stable isotopes) and chemical composition (K/Ca, Ca/Fe).

a) BGGC5

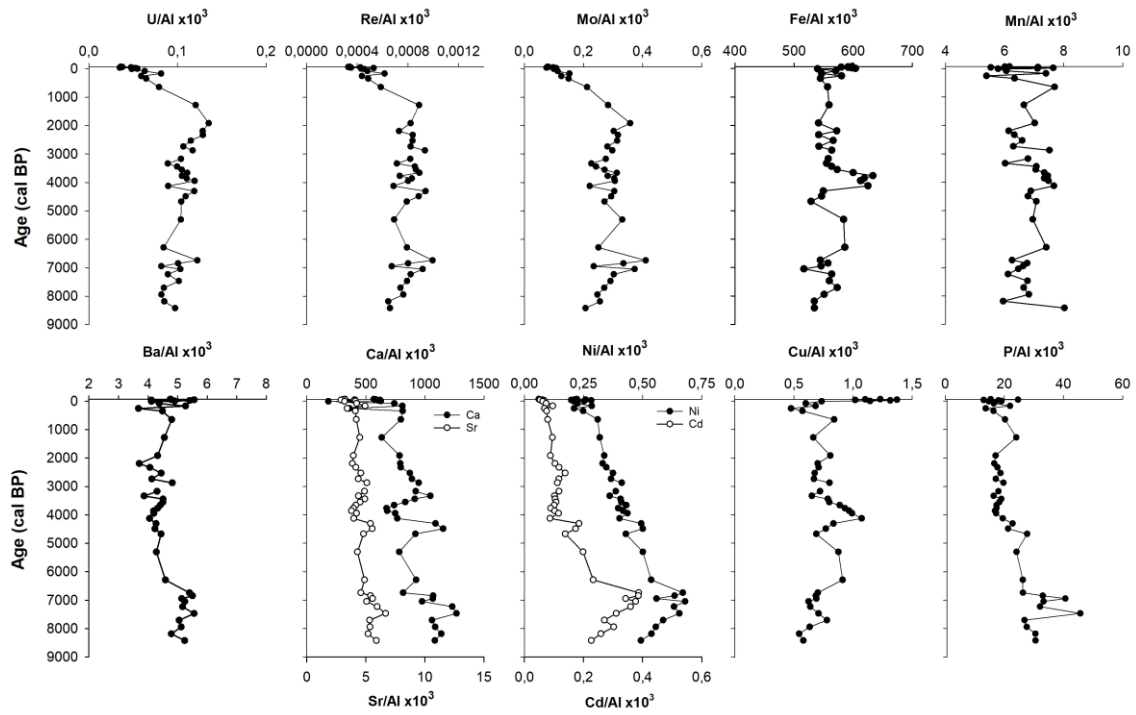

b) BTGC8

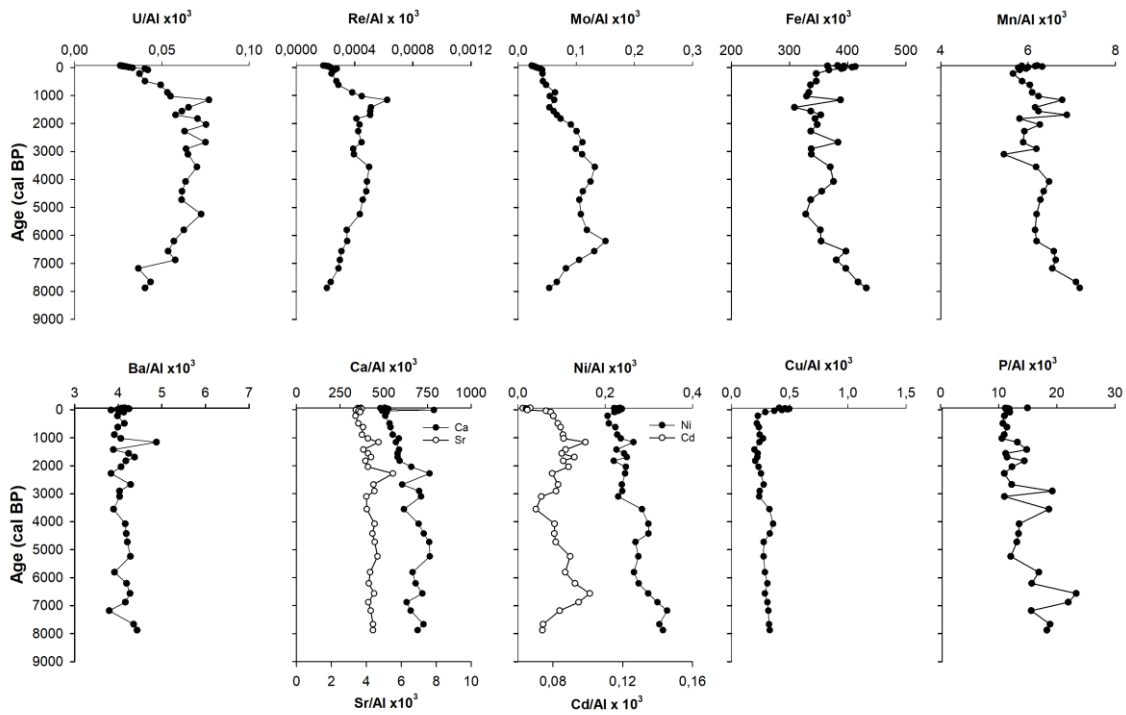

Figure 6. Trace element distribution in sediment cores retrieved from (a) Guanaqueros Bay (BGGC5) and (b) Tongoy Bay (BTGC8), off Coquimbo (30°S).

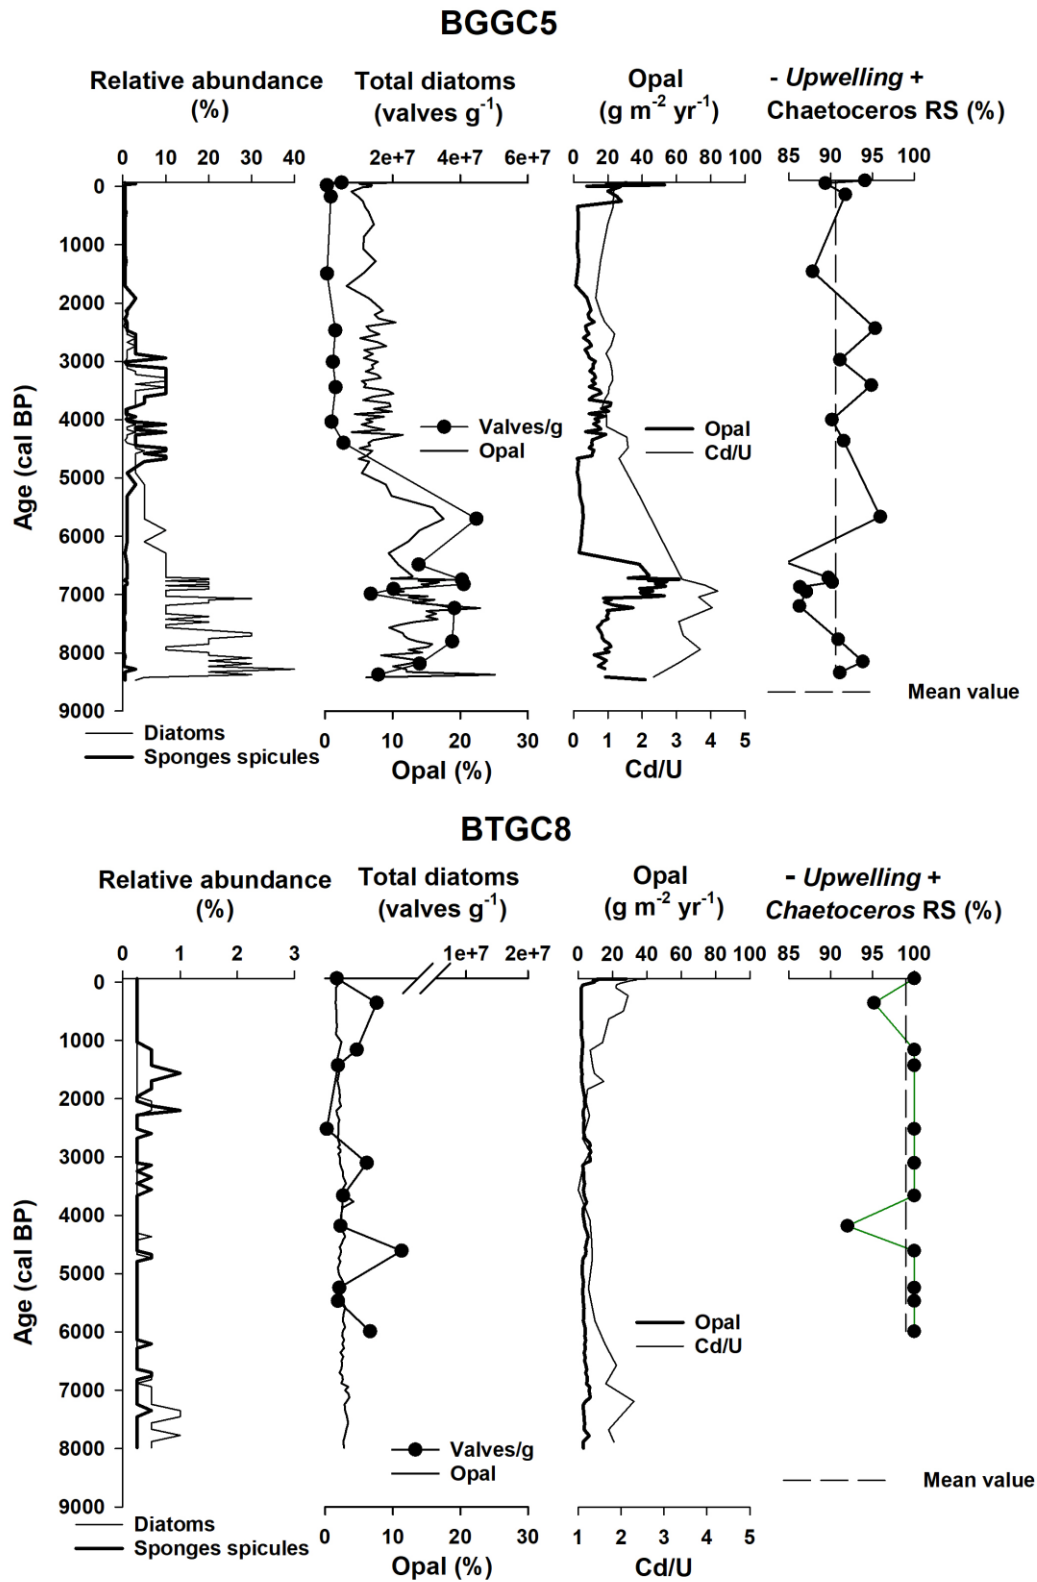

Figure 7. Diatom abundance, opal accumulation and temporal variations in the relative abundance of *Chaetoceros* resting spores in BGGC5 and BTGC8 cores (Guañaqueros and Tongoy Bay, respectively). Cd/U distribution was included as a proxy for redox condition.

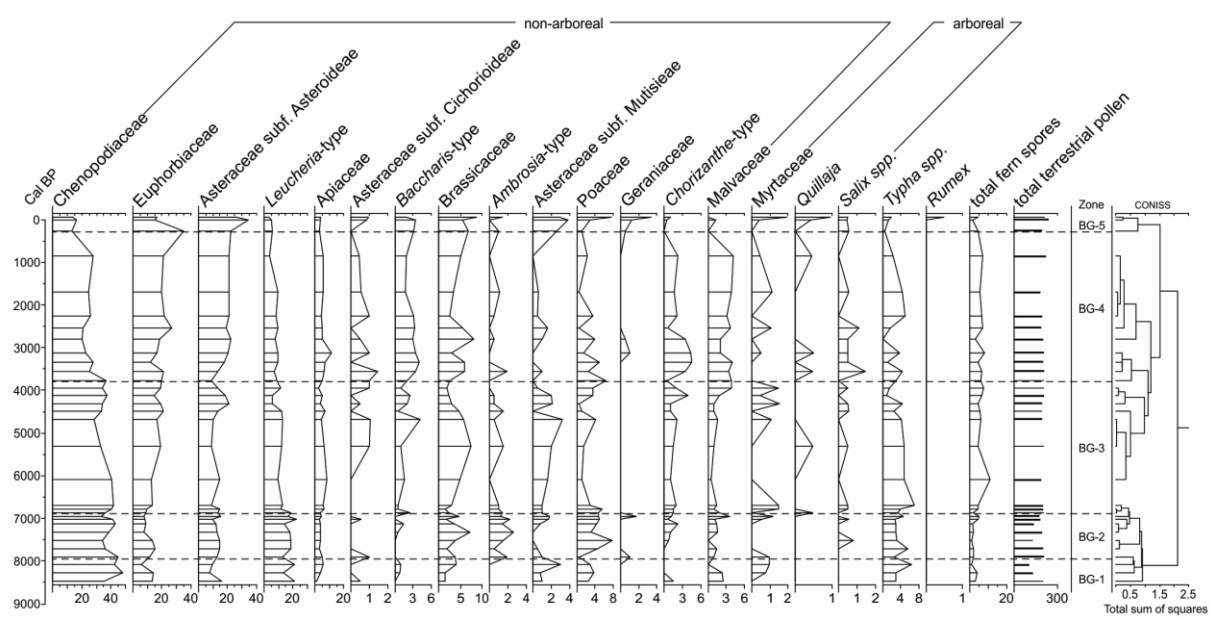

Figure 8. Pollen record in BGGC5 core.

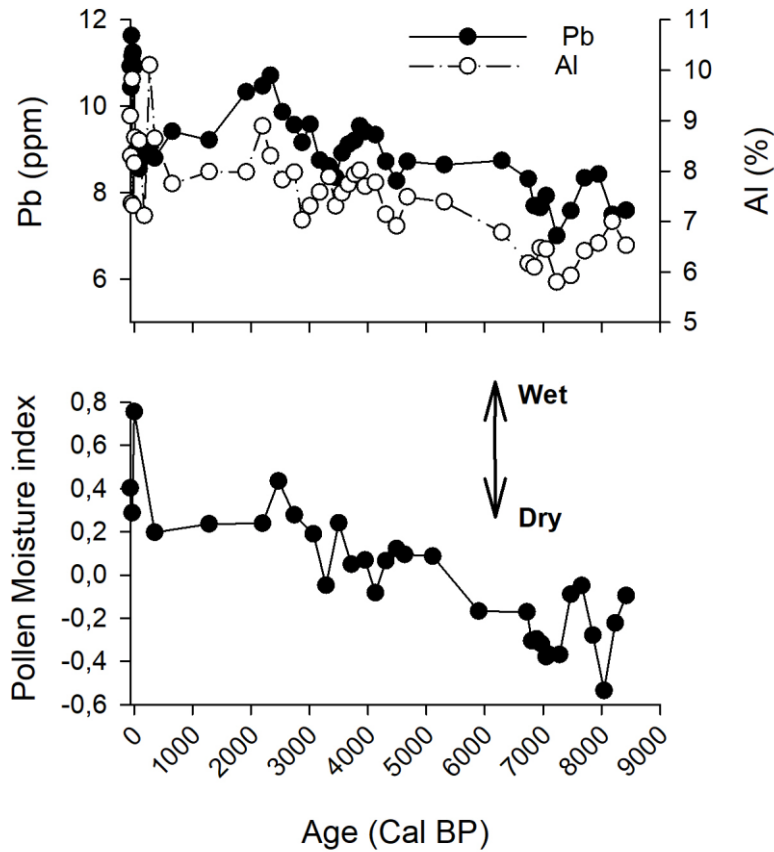

Figure 9. Pollen Moisture Index defined as the normalized ratio between Euphorbiaceae (wet coastal shrub land) and Chenopodiaceae (arid scrubland). Positive (negative) values for this index indicate the relative expansion (reduction) of coastal vegetation under wetter (drier) conditions. Pb and Al distribution at BGGC5 core, representatives of terrigenous input to the bay.
